1 **Mammalian Amoeboid Swimming is propelled by molecular and not**  
2 **protrusion-based paddling in Lymphocytes**

3

4 *Laurene Aoun<sup>1,§</sup>, Paulin Nègre<sup>1,§</sup>, Alexander Farutin<sup>2,§</sup>, Nicolas Garcia-Seyda<sup>1</sup>, Mohd Suhail Rizvi<sup>2</sup>,*  
5 *Rémi Galland<sup>3</sup>, Alphée Michelot<sup>4</sup>, Xuan Luo<sup>1</sup>, Martine Biarnes-Pelicot<sup>1</sup>, C. Hivroz<sup>5</sup>, Salima Rafai<sup>2</sup>, Jean-*  
6 *Baptiste Sibarita<sup>3</sup>, Marie-Pierre Valignat<sup>1</sup>, Chaouqi Misbah<sup>2\*</sup>, Olivier Theodoly<sup>1\*</sup>*

7

8 <sup>1</sup>*Aix Marseille Univ, CNRS, INSERM, LAI, Turing Centre for Living Systems, Marseille, France.*

9 <sup>2</sup>*Univ. Grenoble Alpes, CNRS, LIPhy, 38000 Grenoble, France*

10 <sup>3</sup>*Interdisciplinary Institute for Neuroscience, Centre National de la Recherche Scientifique (CNRS)*  
11 *UMR 5297, Bordeaux, France.*

12 <sup>4</sup>*Aix Marseille Univ, CNRS, IBDM, Turing Centre for Living Systems, Marseille, France*

13 <sup>5</sup>*Institute Curie, INSERM U932, PSL Research University, Paris 75005, France*

14 <sup>§</sup>Equal contributions

15 <sup>\*</sup>*To whom correspondence should be addressed*

16

17

18

19 **ABSTRACT**

20 Mammalian cells developed two main migration modes. The slow mesenchymatous mode, like  
21 fibroblasts crawling, relies on maturation of adhesion complexes and actin fiber traction, while the  
22 fast amoeboid mode, observed exclusively for leukocytes and cancer cells, is characterized by weak  
23 adhesion, highly dynamic cell shapes, and ubiquitous motility on 2D and in 3D solid matrix. In both  
24 cases, interactions with the substrate by adhesion or friction are widely accepted as a prerequisite  
25 for mammalian cell motility, which precludes swimming. We show here experimentally and  
26 computationally that leukocytes do swim, and that propulsion is not fueled by waves of cell  
27 deformation but by a rearward and inhomogeneous treadmilling of the cell envelope. We model the  
28 propulsion as a molecular paddling by transmembrane proteins linked to and advected by the actin  
29 cortex, whereas freely diffusing transmembrane proteins hinder swimming. This mechanism explains  
30 that swimming is five times slower than the cortex retrograde flow. Resultantly the ubiquitous ability  
31 of mammalian amoeboid cells to migrate in various environments can be explained for lymphocytes  
32 by a single machinery of envelope treadmilling.

33

34

35

36

37

38 Individual living cells evolved different strategies to migrate and explore their environment. Bacteria,  
39 microalgae or mammalian gametes can swim in suspension in a fluid, under the propulsion of a  
40 flagellum<sup>1</sup> or of shape deformations<sup>2</sup>, whereas somatic mammalian cells crawl with adhesion on a  
41 solid tissue, via a continuous sequence of forward pushing of the cell front, strengthening of  
42 adhesions at the leading edge, and pulling of the cell rear<sup>3,4</sup>. In vivo, mammalian cells crawl either on  
43 2D substrates, like leukocytes on inner blood vessels or epithelial surfaces, or in 3D environments  
44 within tissues. The critical role of adhesion for crawling motility was recently revised in the case of  
45 amoeboid mammalian cells, i.e. white blood cells and cancer cells. Amoeboid cells differ from  
46 mesenchymatous cells (e.g. fibroblasts) by a significantly higher velocity (typically 5-20  $\mu\text{m}\cdot\text{min}^{-1}$  vs  
47 0.1-1  $\mu\text{m}\cdot\text{min}^{-1}$ ) and highly dynamic shape deformations. Whereas amoeboid cells crawl on adhering  
48 substrates like mesenchymatous cells do, they also remain highly motile in the absence of adhesion,  
49 provided that they are confined by a 3D environment<sup>5-7</sup>. This motility in non-adherent conditions was  
50 explained by a chimneying<sup>6</sup> mode where cell-substrate interactions are mediated by friction instead  
51 of adhesion<sup>8-10</sup>. Altogether, there is common agreement that amoeboid motility of mammalian cells  
52 is strictly dependent on adhesion on 2D substrates and on adhesion/friction in 3D media, while non-  
53 adherent 2D migration and swimming are precluded<sup>5,11</sup>.

54 In contradiction with the paradigm of adhesive or frictional crawling, Barry and Bretscher<sup>12</sup> reported  
55 in 2010 that human neutrophils do swim. They suggested that propulsion may result from membrane  
56 treadmilling (rearward movement of the cell surface) or shape-deformation (protrusions and  
57 contractions along the cell body) but provided no experimental or theoretical evidence supporting  
58 either of these hypotheses. Most investigations were later performed on swimming of a non-  
59 mammalian eukaryotic cell, the amoeba *Dyctyostellium discoideum*. Some studies have defended a  
60 deformation-based propulsion<sup>13,14</sup>, whereas another one discarded both treadmilling and shape  
61 deformation<sup>15</sup>. For tumoral cells, one theoretical model of blebbing mentioned the possibility of  
62 migration in suspension by shape changes<sup>16</sup>, whereas other modeling efforts validated a swimming  
63 mechanism based on shape deformation for the case of cyanobacteria<sup>17</sup> and microalgae<sup>2</sup>. A recent  
64 study on mesenchymatous macrophages cell line RAW 264.7 reported an amoeboid swimming mode  
65 artificially triggered by optogenetic activation of actomyosin contractility in cell rear<sup>18</sup>. Propulsion  
66 convincingly involved membrane treadmilling, whereas contribution deformations was not assessed.  
67 Altogether, swimming of cells without flagellum remains mostly explained by shape deformation  
68 mechanisms, and besides, swimming of mammalian cells without flagellum remains widely  
69 discarded<sup>5,6,11,19-23</sup>.

70 Here, we demonstrate the existence of mammalian amoeboid swimming on human T lymphocytes  
71 and decipher its functioning experimentally and theoretically at the cellular and molecular scales. T

72 lymphocytes are known to crawl on 2D adhering substrates<sup>24–27</sup> and in 3D matrices via  
73 adhesion/friction<sup>10,28,29</sup> at typical velocities of 20  $\mu\text{m}\cdot\text{min}^{-1}$ . We observed swimming both in bulk  
74 solution and in the vicinity of anti-adhesive substrates and quantified an average speed of 5  
75  $\mu\text{m}\cdot\text{min}^{-1}$ . Experimental and theoretical evidences show that swimming is propelled by a molecular  
76 paddling of the transmembrane proteins linked to actin, which are axisymmetrically recycled  
77 between cell front and back by retrograde treadmilling at the plasma membrane and anterograde  
78 vesicular transport inside cells. This molecular description explains also quantitatively why swimming  
79 is significantly slower than the retrograde flow of the cell cortex and cell adhesive crawling.

80

## 81 **RESULTS**

### 82 **Leukocytes swim without adhesion or friction with a solid substrate**

83 Upon recruitment from the blood stream toward inflammation zones, leukocytes arrest and crawl on  
84 the inner surface of blood vessels (2D migration). Crawling was here reproduced in vitro with human  
85 primary effector T lymphocytes on glass substrates coated with ICAM-1 molecules, a specific ligand  
86 for the integrin adhesion molecules LFA-1 ( $\alpha\text{L}\beta\text{2}$ ). Effector T lymphocytes were already polarized in  
87 suspension, with a front pole forming protrusions under the influence of actin polymerization and a  
88 rear pole undergoing contraction cycles enforced by acto-myosin contractility. When introduced into  
89 a chamber coated with ICAM-1, lymphocytes sedimented, adhered to, and migrated on the  
90 substrates. They crawled with a random walk pattern (Figure 1-A and Suppl. Mat. Movie 1) of  
91 curvilinear velocity  $14.7 \pm \text{SD } 7.5 \mu\text{m}\cdot\text{min}^{-1}$ , with a wide front pole (lamellipod), the nucleus  
92 positioned in the cell central zone, and a narrow tail (uropod). Interferometric imaging, in which a  
93 dark contrast of adhesive zones corresponds to a distance smaller than 50 nm<sup>30</sup>, attested for a  
94 molecular contact between cell and substrate (Figure 1-A-iii and Suppl. Mat. Movie 1). To challenge  
95 the idea that adhesion is necessary for amoeboid migration on a 2D substrate, we replaced the  
96 ICAM-1 surface treatment by an anti-adhesive coating of Pluronic<sup>®</sup> F127. In the absence of adhesion  
97 cells were highly sensitive to residual flow drifts, so the determination of intrinsic self-propulsion  
98 required experimental caution to approach “zero flow” conditions. Using narrow microfluidic  
99 channels and pressure controllers (see material and methods) to reduce lateral drift, we observed  
100 cell sedimentation on the substrate and a random walk migration (Figure 1-B and Suppl. Mat. Movie  
101 1) with an apparent average curvilinear speed of  $5.5 \pm \text{SD } 2.2 \mu\text{m}\cdot\text{min}^{-1}$ . The shape of the swimming  
102 cells (Figure 1-B-ii and Suppl. Mat. Movie 1) looked similar to the ones of crawling cells with a  
103 somewhat less wide lamellipod. However, interferometric imaging attested that swimming cells were  
104 non-adherent (Figure 1-B-iii and Suppl. Mat. Movie 1), as the brightness of the contact zone

105 corresponded to a liquid film separating the cell membrane from the substrate by more than 100 nm.  
106 Swimming in the vicinity of a substrate was further imaged in 3D by spinning-disk microscopy (Suppl.  
107 Mat. Movie 2) and, although strong phototoxicity hampered long-term 3D imaging, swimming of  
108 polarized cells with highly dynamic 3D shape deformation was evident on tens of micrometers.  
109 Hence, in contrast to most literature reports, lymphocytes do migrate on a 2D surface in the absence  
110 of adhesion.

#### 111 **Transition between crawling and swimming is fast**

112 Swimming appears slower than crawling, however it is not clear if this difference results from the  
113 existence of two distinct machineries or only from a different coupling between the environment a  
114 conserved propelling machinery. To shed light on a potential switch between distinct migration  
115 modes, we presented cells to substrates patterned with alternated stripes of adhesive and anti-  
116 adhesive coatings with a periodicity of 20  $\mu\text{m}$  (Figure 1-C and Suppl. Mat. Movie 3). Surprisingly, cells  
117 escaped frequently the adhesive zones (red stripes), something not observed in similar experiments  
118 with mesenchymatous cells<sup>31</sup>. Furthermore, although interference microscopy attested that cells  
119 travelled across the adhesive zone with adhesion (green signal) and on anti-adhesive zones without  
120 attachment (no green signal), there was no evident lag time or change in cell morphology dynamics  
121 upon transition from crawling to swimming. These observations support either that switching  
122 between crawling/swimming modes is fast, or that crawling and swimming share a common  
123 machinery, discarding the existence of a mode switching.

#### 124 **Leukocytes swim in free suspension**

125 Although leukocytes migrated in the vicinity of a surface without adhesion, cell-substrate distance  
126 remained in the nanometric range. Hence, swimming close to a substrate could rely on  
127 hydrodynamic coupling between cell and substrate. We therefore performed experiments with cells  
128 in bulk suspension to avoid any hydrodynamic interference with solid walls. The experimental  
129 challenge consisted in cancelling all artefactual passive cell movements that may superimpose to  
130 active self-propulsion. Passive cell displacement can arise from cell sedimentation as well as from  
131 flow drifts due to temperature gradients, pressure imbalance between channel outlets or gravimetric  
132 imbalance due to cell dispersion inhomogeneity. Experiments were performed with a 90° tilted  
133 microscope, a vertical microfluidic channel, Ficoll supplemented medium to match the average  
134 density of cells, a high precision pressure controller and highly resistant tubing connections to slow  
135 down pressure-driven flows (Figure 1-D and Suppl. Mat. for details). In this configuration, the vertical  
136 axis corresponded to the direction of both pressure-driven flow across the microchannel and gravity-  
137 induced sedimentation flow. Hence, cell velocity along the vertical axis was not quantitatively

138 exploitable, because flow drifts and sedimentation effects, although lowered, remained in the range  
139 of a few  $\mu\text{m}\cdot\text{min}^{-1}$  and were not negligible as compared to swimming velocities (Figure 1-E and suppl.  
140 Mat. Movie 4). Swimming prowess was nevertheless measurable on the two other axes. Figure 1-F  
141 shows that cells in bulk suspension swam with an apparent average curvilinear speed around  $9.5 \pm$   
142  $SD 4.2 \mu\text{m}\cdot\text{min}^{-1}$  (images taken every 30s), which confirmed the intrinsic capability of lymphocytes to  
143 swim. In what follows, systematic measurements were however performed with cells close to a non-  
144 adherent substrate because theoretical calculations agreed that the vicinity of a single wall has a  
145 negligible effect on swimming velocity (Figure S 5).

#### 146 **Diffusive versus active motion in swimming conditions**

147 Cells velocity estimated by averaging the displacements of cell mass centres over intervals of 30 s  
148 yielded a significant difference between swimming and crawling (**Figure 2-A**). However, the cell  
149 population obtained from the in vitro activation of lymphocytes comprises two fractions of cells, one  
150 of round and inactive cells, and the other of polarized and active cells. In crawling experiments,  
151 round cells, generally non-adherent, were washed away by residual flows and therefore not present  
152 in the recorded data. By contrast, in swimming experiments, both active and inactive cells were  
153 taken into account because residual flows were cancelled, so that the average raw velocity was  
154 biased towards lower values for swimming. **Figure 2-B** presents the histogram of raw velocities for  
155 each individual cells of a population of live lymphocytes and of the same population fixed by  
156 paraformaldehyde where all cells have a frozen shape. The histogram of live cells presents two  
157 populations. One population has a low velocity close to the one of fixed cells, allowing one to link this  
158 population with inactive cells. The high velocity population, corresponding to swimming cells, is  
159 characterized by a fraction of 80% and an average raw curvilinear speed of  $5.9 \pm 4.2 \mu\text{m}\cdot\text{min}^{-1}$ .  
160 However, this determination of swimming speed includes also from diffusion effects. Indeed, fixed  
161 cells without swimming activity have an average raw curvilinear speed of  $2.8 \pm 0.3 \mu\text{m}\cdot\text{min}^{-1}$ . We  
162 therefore performed a detailed analysis of the cell trajectories to extract diffusive contribution to  
163 motion. First, we investigated the mean square displacement averaged over all cells in the  
164 population as a function of time. Second, we fitted the mean square displacements as a function of  
165 time interval by a random-walk law, which combines 2D Brownian-like diffusion with persistent  
166 motion, and we analysed the distribution of velocities  $v_s$  and diffusion coefficients  $D_t$  obtained by the  
167 fitting procedure:

168 Equation 1 
$$\langle [r(t) - r(0)]^2 \rangle = v_s^2 t^2 + 4D_t t,$$

169 We then separated all cells in the population into two groups. We considered active the cells that  
170 travelled at least a distance of 25  $\mu\text{m}$  (about two cell diameters) during the acquisition time of 13

171 min. The rest of the cells were referred to as inactive. The results of the analysis are shown in **Figure**  
172 **2-C** and **D**. **Figure 2-C** shows the mean square displacement as a function of time for all cells  
173 combined, and for inactive and active cells separately. We also present the results with fixed cells,  
174 which are only affected by thermal diffusion. The guides suggest that both inactive and fixed cells  
175 had a diffusive behaviour, with an average diffusion coefficients of respectively  $2.3 \mu\text{m}^2.\text{min}^{-1}$  and  $1.1$   
176  $\mu\text{m}^2.\text{min}^{-1}$ , respectively. On the contrary, active cells showed a superdiffusive behaviour, which could  
177 not be fitted by Equation 1. A satisfactory fit (black curve in Figure 2-C) was obtained when we  
178 extended the model by adding rotational diffusion, which accounted for gradual changes in the  
179 swimming direction of the cells (see Suppl. Mat.). The fitting procedure gave here  $v_s = 4.3 \mu\text{m}.\text{min}^{-1}$ ,  
180  $D_r = 0.19 \text{ min}^{-1}$  and  $D_t = 7.28 \mu\text{m}^2.\text{min}^{-1}$ . To obtain the distribution of velocities of active cells, we  
181 simplified the analysis and considered only displacements for time intervals of 2 min, which is 3 times  
182 smaller than  $\langle 1/D_r \rangle$ , to remove the influence of the rotational diffusion. As can be observed in **Figure**  
183 **2-D**, most of the active cells had a velocity around 3 to 5  $\mu\text{m}.\text{min}^{-1}$ . Root mean square velocity  
184 extracted from individual fits of active cells ends up to be equal to  $4.9 \mu\text{m}.\text{min}^{-1}$  in cell medium. In  
185 order to determine the influence of viscosity on the swimming speed, similar experiments and  
186 analysis were also performed in medium supplemented with dextran of molecular weight 2,000 kDa.  
187 Swimming speed was found unchanged when viscosity was increased 100 times (Suppl. Mat. Table 1  
188 and Figure S 1). Altogether, the average swimming velocity is largely independent of the viscosity of  
189 the external medium and equal to around  $5 \mu\text{m}.\text{min}^{-1}$ , which is significantly smaller than the crawling  
190 speed of  $15 \mu\text{m}.\text{min}^{-1}$ , and.

### 191 **Actin mediates swimming propulsion by polymerization and to a lesser extent contractility**

192 Actin cytoskeleton is widely accepted as the molecular engine that propels cell crawling. To get more  
193 insight into its role on cell swimming, we used several actin inhibitors. Effector T cells are  
194 characterized by a strongly polarized state with actomyosin contractility mainly in the cell rear  
195 (uropod), and actin polymerization mainly in the cell front (lamellipod). Blebbistatin, a potent  
196 inhibitor of actomyosin contractility, strongly affected cells morphology (Figure 3-A and Suppl. Mat.  
197 Movie 5), as cells displayed a roughly round cell body with no distinct uropod and no contractile  
198 activity. Active cells had nevertheless a small-size lamellipod, which attested that they conserved a  
199 partial, albeit stable front-rear polarization. Interestingly, active cells were still swimming, and always  
200 in the direction of the lamellipod. The velocity and fraction of swimming cells were decreased around  
201 a factor of two as compared to control cells (Figure 3-B and Table 1). These results prove that frontal  
202 polymerization alone can propel swimming, while rear contractility is not necessary although it  
203 somehow participates to propulsion efficiency. We then perturbed actin polymerization in the cell  
204 front with Latrunculin A (Figure 3-A Suppl. Mat. Movie 5). The dose was specially titrated to inhibit

205 the lamellipod at the cell front while preserving contractility in the cell rear. Latrunculin-treated cells  
206 were deprived of lamellipod and conserved a uropod, which is the opposite situation to blebbistatin-  
207 treated cells. The fraction of swimming cells and the mean velocities were significantly lower than for  
208 blebbistatin-treated cells (Figure 3-B and Table 1), which supports further that the lamellipod plays a  
209 preponderant role in swimming propulsion. We then treated cells with CK666, an inhibitor of the  
210 protein Arp2/3 that mediates branching of the actin network in lamellipods (Figure 3-A Suppl. Mat.  
211 Movie 5). While the front of migrating leukocytes usually displays lamellar shaped protrusions<sup>32</sup>,  
212 CK666-treated cells formed filopodia and blebs in the cell front. The effect of CK666 on swimming  
213 speed was found intermediate between blebbistatin and Latrunculin cases. Altogether, swimming  
214 was more efficient with a perturbed lamellipod (CK666) than without lamellipod (Latrunculin), which  
215 is self-understanding since lamellipod was found important for propulsion. Moreover, swimming was  
216 more efficient for totally inhibited uropod (CK666) than for partially inhibited lamellipod  
217 (blebbistatin), which confirmed that swimming is mediated in a larger extent by lamellipod rather  
218 than uropod. Finally, swimming was fully abrogated with a combination of blebbistatin and  
219 Latrunculin (Figure 3-A,B), from which we conclude that the actin network is the only engine of  
220 lymphocyte swimming.

#### 221 **Paddling by rearward travelling of membrane protrusions does not propel lymphocyte swimming**

222 Swimming propulsion arises from the interactions of the cell external envelope with the surrounding  
223 fluid, therefore the dynamic properties of the cell external envelope is the key of the swimming  
224 mechanism. Like all amoeboid cells, lymphocytes display highly dynamic shape deformations. These  
225 normal movements of cell envelope are therefore a good candidate for propulsion drive. Since  
226 spinning disk imaging was limited by the strong photosensitivity of primary human T lymphocytes,  
227 we resorted to light-sheet soSPIM microscopy and transfected cells with RFP-Lifeact to visualize  
228 precisely the 3D dynamics of cell cytoskeleton (Figure 4-A and Suppl. Mat. Movie 6). 3D imaging  
229 revealed waves of lamellar protrusions that formed in the cell front<sup>32</sup> with different orientations,  
230 traveled backwards and vanished when reaching the cell central and rear zones. Similar propagating  
231 waves of cell envelope were also visible in transmission microscopy (Figure 4-B), together with  
232 constriction rings (Figure 4-C)<sup>21</sup>. Constriction rings formed around the cells central zone, and the  
233 nucleus was intermittently pushed forward through the rings, provoking sudden and important  
234 reorganization of the contour of cells (Suppl. Mat. Movie 7). Hence, the dynamics of lymphocyte  
235 morphology is qualitatively reminiscent of the shape-deformation cycles analyzed in theoretical  
236 modeling of amoeboid swimming<sup>2</sup>. However, Figure 4-D shows that blebbistatin-treated cells keep  
237 quasi-static cell body shapes, which is very different to control cells, but nevertheless swim. This  
238 observation strongly suggests that shape deformations is not essential in leukocyte swimming. To



239 assess precisely its contribution, we developed a direct numerical simulation of normal active forces  
240 applied to the cell membrane (with force-free and torque-free conditions) that generated “blebbing  
241 waves” backwards along the cell body (Figure 4-E and suppl. Mat Movie 8). Simulations showed that  
242 deformation cycles yield swimming propulsion with a generated swimming motion about 1000 times  
243 slower than the blebbing wave. In contrast, the waves speed were found experimentally around 10  
244  $\mu\text{m}\cdot\text{min}^{-1}$ , which is in the same magnitude as the swimming speed (Figure 4). We conclude that  
245 amoeboid shape deformation, i.e. normal movements of cell envelope, cannot explain the amoeboid  
246 swimming of lymphocytes.

#### 247 **Membrane rearward treadmilling correlates with swimming speed**

248 Normal motion of cell envelope does not yield sufficient propulsion, but the membrane of amoeboid  
249 cells displays also tangential movement, triggered by the retrograde flow of the inner actin cortex. To  
250 probe the motion of cells external envelope, we tracked beads coated by ICAM-1 molecules and  
251 attached to cells via the transmembrane integrins LFA-1 (Figure 5-A and Movie 9). Beads displayed a  
252 backward motion in the reference frame of the cell with an average velocity of  $12 \pm 3 \mu\text{m}\cdot\text{min}^{-1}$ ,  
253 which is significantly larger than cell swimming velocity. The same experimental approach was  
254 applied in presence of the actin inhibitors blebbistatin, CK666 and latrunculin A (Figure 5-A and  
255 Movie 9). The retrograde motion of beads attached to cells membrane decreased in the presence of  
256 all inhibitors. Furthermore, the decrease of beads velocity with blebbistatin, CK666 and latrunculin A  
257 correlated with the respective decrease in swimming speed (Figure 5-B). These data strongly suggest  
258 a link between tangential envelope motion and swimming propulsion.

#### 259 **Retrograde flow of cell envelope can propel swimming**

260 To analyze quantitatively the propulsion strength induced by tangential movements of the cell  
261 envelope, we proposed a basic model of retrograde flow for a cell envelope composed of an internal  
262 actin cortex, a cytoplasmic lipidic membrane and transmembrane proteins protruding outside the  
263 cell (Figure 5-C). The transfer of movement from the inner cortex to the fluid surrounding the cell can  
264 be total or partial depending on the coupling mechanism between the cortex, the lipidic membrane  
265 and the transmembrane proteins, as discussed below. We first considered that the cell surface was  
266 made of a homogeneous envelope with an average treadmilling velocity proportional to the velocity  
267 of the actin cortex,  $v_a$ , with a proportionality transmission coefficient, denoted as  $\beta$ . In the  
268 laboratory frame, the velocity of the fluid adjacent to the cell envelope, denoted as  $v_f$ , is:

269 Equation 2 
$$v_f(r) = \beta v_a(r) + v_s + \omega_s r$$

270 where  $v_s$  and  $\omega_s$  are respectively the translation and rotation swimming velocities of the cell. They  
271 were obtained by solving the Stokes equations (see Suppl. Mat.) in the fluid outside the cell, taking as  
272 boundary conditions that the flow vanished at large distances away from the cell, and that it obeyed  
273 Equation 2 at the cell surface. The obtained flow field was parametrized by the still unknown  
274 quantities  $v_s$  and  $\omega_s$ , which allowed us to express the viscous forces acting on the cell. The system  
275 was closed by imposing that the total force and torque acting on the swimmer vanished, yielding the  
276 values of  $v_s$  and  $\omega_s$ . A remarkable observation is that the swimming velocity does not depend on the  
277 viscosity of the suspending medium for a given cortex velocity (see Suppl. Mat. for a proof), which is  
278 consistent with experimental observations (Suppl. Mat. Figure S 1). The problem could be solved  
279 analytically for a sphere (**Figure 5-D**) and the swimming velocity was given by  $v_s = \beta v_0$ , where  $v_0$  is  
280 the retrograde flow velocity at the equator. For other shapes, we solved numerically the problem  
281 using the boundary integral formulation for the Stokes equations (see Suppl. Mat.). In particular, we  
282 discretized a shape of T-lymphocyte obtained by 3D spinning disk microscopy (**Figure 5-E**) and  
283 introduced an actin source in a small region at the front of the cell and a sink at its rear. The overall  
284 flow pattern was similar to the spherical one and the swimming velocity was close to the velocity of  
285 the cell envelope in the central region of the cell (in the cell frame), as with the spherical shape  
286 (Suppl. Mat. Movie 10). Besides, since most experimental data were obtained for cells close to a rigid  
287 wall, we checked numerically that the swimming velocity was largely insensitive to the distance to  
288 the wall (Suppl. Mat. Figure S 5). Altogether, this analysis shows that swimming speed has the same  
289 magnitude as treadmill speed of the external envelope, meaning that cortex retrograde flow can  
290 propel lymphocytes swimming and may even be the sole propelling source.

### 291 **Cell swimming at the molecular scale**

292 The propulsion model by a treadmill membrane yielded almost equal speed of cell swimming and  
293 of envelope treadmill, but experimental swimming speed,  $v_s \sim 5 \mu\text{m}\cdot\text{min}^{-1}$ , is more than 2 times  
294 smaller than the envelope treadmill speed, measured above  $10 \mu\text{m}\cdot\text{min}^{-1}$  with beads attached to  
295 the membrane. This difference suggests an incomplete coupling between the external cell envelope  
296 and the surrounding fluid, whereas our model considered a total coupling between the fluid and a  
297 homogeneous envelope. In fact, both the composition and the dynamics of a cell cytoplasmic  
298 membrane are highly heterogeneous at the molecular level. The external fluid is in contact with the  
299 numerous lipids and transmembrane proteins of the membrane, and each of these components have  
300 different diffusion coefficients and interactions properties. If the retrograde flow of actin cortex and  
301 actin-bound transmembrane proteins is well attested, the circulation of lipids and of non-actin-  
302 bound transmembrane proteins is hardly documented. To get more insight into the molecular  
303 dynamics of the cell envelope at the time scale of tens of seconds and at the spatial scale of the

304 entire cell, which are the relevant scales for cell swimming, we therefore performed live FRAP-TIRF  
305 measurements on non-adherent cells maintained in the vicinity of the probing glass/fluid interface  
306 using depletion force induced by addition of dextran in the medium. On RFP-actin transfected cells,  
307 we observed the motion of actin clusters that displayed no detectable diffusion. Actin cortical  
308 cytoskeleton behaved like a solid gel (**Figure 6-A,C,E** and **Movie 11** and **Movie 12**) flowing backwards  
309 at  $24 \pm 9 \mu\text{m}\cdot\text{min}^{-1}$  (**Figure 6-I**). This result is consistent with literature data with a speed value in the  
310 top range of the ones measured in other cellular systems (between 6 and  $20 \mu\text{m}\cdot\text{min}^{-1}$ )<sup>11,22,29,33,34</sup>.  
311 For transmembrane proteins, different dynamics are expected whether proteins bind or not to the  
312 actin cortex. To shed light on this issue, we used specific fluorescent antibodies to probe an actin-  
313 bound protein, the integrin LFA-1 in its high affinity state, and a non-actin-bound protein, the T cell  
314 receptor ligand MHC-1. Like actin, actin bound proteins LFA-1 was found to form clusters that  
315 persistently flowed backward (**Figure 6-B,D,E**) with an average velocity of  $25 \pm 5 \mu\text{m}\cdot\text{min}^{-1}$  (**Figure 6-**  
316 **I**). This velocity is similar to the velocity of actin retrograde flow, which is consistent with a strong  
317 attachment rate of high-affinity integrins to subcortical actin. No diffusion was detectable. By  
318 contrast, non-actin-bound proteins MHC-1 displayed mostly a diffusive dynamics in FRAP  
319 experiments (**Figure 6-G** and **Movie 11**) with a characteristic diffusion coefficient of  $D = 0.26 \pm 0.22$   
320  $\mu\text{m}^2\cdot\text{s}^{-1}$  (**Figure 6-J**). Similarly, for the lipidic layer, FRAP experiments with Vybrant® DiO lyophobic  
321 molecules inserted in the cytoplasmic membrane (**Figure 6-H** and **Movie 11**) yielded a diffusion  
322 coefficient of  $3.1 \pm 1.8 \mu\text{m}^2\cdot\text{s}^{-1}$  (**Figure 6-J**). Altogether, these results clearly revealed that molecular  
323 dynamics within plasma membrane differ strongly between the actin-bound and non-actin-bound  
324 transmembrane protein, the former being actively dragged backwards and the latter being mainly  
325 diffusive. This heterogeneity may explain the discrepancy between the speeds of swimming and actin  
326 retrograde flow.

### 327 **LFA-1 molecules are extruded at the cell front and MHC-1 are only diffusive**

328 Membrane molecular dynamics is clearly heterogeneous, but the exact participation of the different  
329 membrane components to molecular paddling remains unclear. The backwards motion of actin-  
330 bound proteins certifies their participation to swimming. In contrast, for lipids and non-actin-bound  
331 proteins, their fast diffusion limited the detection of treadmill speed to values above  $50 \mu\text{m}\cdot\text{min}^{-1}$ ,  
332 which backward flow is expected to be smaller than actin speed of  $25 \mu\text{m}\cdot\text{min}^{-1}$ . To get further insight  
333 into the exact traffic properties of non-actin-bound proteins, it is however interesting to consider  
334 that a sustainable axisymmetric retrograde flow of material at cell membrane must topologically be  
335 coupled to an internal anterograde flow. Mechanism of internal integrins recycling by anterograde  
336 vesicular transport have recently been documented in the literature<sup>35-38</sup>, albeit not for leukocytes nor  
337 LFA-1. FRAP experiments on cell front revealed indeed a source of unbleached LFA-1 integrins at the

338 cell leading edge (Figure 7-A and Suppl. Mat Movie 13) arising from the extrusion of integrins after  
339 internal trafficking. Interestingly, the cycle extrusion/treadmilling of integrins occurs here within a  
340 minute, which is consistent with migration and swimming scale, whereas literature reported longer  
341 timescales around 15-30 min<sup>36,37</sup>. This observation validates the complete cycling of integrins by  
342 treadmilling and vesicular transport. In contrast, FRAP experiments with MHC-1 proteins displayed a  
343 fluorescence recovery only from the cell back (Figure 7-B and Suppl. Mat. Movie 13) without source  
344 of material at cell front, which directly supports that internal recycling is not occurring for this non-  
345 actin-bound protein. Altogether, FRAP-TIRF data support strongly that actin-bound proteins undergo  
346 mostly advected retrograde flow externally and forward vesicular transport internally with an axial  
347 symmetry around cell poles, whereas non-actin-bound proteins undergo mostly diffusion at the cell  
348 surface without internal recycling. Hence, the cell external envelope does not treadmill as a whole  
349 and only a fraction of envelope molecules treadmill and paddle to propel swimming.

### 350 **Model of retrograde flow transmission**

351 In order to model the coupling between actin retrograde flow and the external fluid through a  
352 heterogeneous envelope, we considered the layers of transmembrane proteins protruding in the  
353 external fluid as a brush of polymeric molecules, and analyzed the flow inside the brush composed of  
354 either advected or diffusing molecules. Based on polymer science developments, the brush of  
355 proteins was considered as a Brinkman medium<sup>39</sup> with a hydrodynamic penetration length, denoted  
356 as  $\lambda^{-1} \sim r / [2(\varphi_i^{2D})^{1/2}]$ , where  $\varphi_i^{2D}$  is the area fraction occupied by advected transmembrane  
357 proteins (e.g. integrins) and  $r$  is the typical lateral extent of the proteins on the membrane. The  
358 transmission coefficient can be expressed as:

359 Equation 3  $\beta = 1 - 2g / (1 + g^2)$  with  $g = e^{\lambda h}$

360 where  $h$  is the brush thickness. We first considered the effect of advected proteins linked to actin.  
361 The two integrins LFA-1 and VLA-4 were measured on T lymphocytes with an average occurrence of  
362 25,000 and 15,000 molecules per cell (Suppl. Mat. Figure S 2). Considering a radius  $r = 5$  nm for each  
363 integrin and an excess of membrane in microvilli of 150 %, the surface occupancy of LFA-1/VLA-4  
364 corresponds to a mere 0.1 %. The fact that integrins are not in high affinity state at the same time  
365 would tend to decrease further this value. However, T lymphocytes express several other integrins  
366 than LFA-1/VLA-4 as well as other transmembrane proteins linked to actin (e.g. TCR or CD44), which  
367 contribute to increase the fraction of cell surface occupied by advected molecules. All in all,  
368 exhaustive experimental data are lacking to determine the exact value of  $\varphi_i^{2D}$ . Assuming  $\varphi_i^{2D}$  of 2%  
369 and  $h$  of 20 nm, the theoretical coupling value was found at  $\beta = 0.2$ , which is in agreement with the  
370 experimental result of a swimming velocity 5 times smaller than the cortex retrograde flow. The

371 effect of diffusing transmembrane proteins was also taken into account by considering that they  
372 were indirectly advected by the drag of the external fluid and by viscous interactions within the  
373 membrane. Modeling of fluid drag and estimation of membrane viscosity from FRAP measurements  
374 allowed us to show that membrane viscosity dominates over the external fluid drag (Suppl. Mat) and  
375 that the presence of diffusing transmembrane proteins reduces the value of  $\beta$  (Suppl. Mat Figure S  
376 6).

377

## 378 DISCUSSION

379 Amoeboid migration of mammalian cells, i.e. leukocytes and cancer cells, has attracted intensive  
380 interest in the last decade for the ubiquitous ability to migrate at high speed in various 2D and 3D  
381 environments. The requirement of adhesion with a substrate remains a widely accepted hallmark for  
382 2D migration<sup>11,20,21 22 5-7,25,40,23</sup>, whereas two studies reported non-adherent motility or swimming  
383 with leukocytes<sup>18,41</sup>. In this context, we provided here direct experimental proof and quantification of  
384 swimming by wild lymphocytes, together with an original theoretical model of molecular paddling  
385 that explains propelling of lymphocytes amoeboid swimming.

386 In principle, cell swimming without flagella can be propelled either by normal (protrusion) and/or  
387 tangential (treadmilling) motion of the cell envelope. Mechanistic studies of swimming by eukaryotic  
388 cells have mostly focused on amoeba *Dictyostelium discoideum* and favored propulsion by shape  
389 deformation rather than treadmilling<sup>13,14</sup>. Interestingly, the recent study of O'neil et al<sup>18</sup> proposed  
390 instead that membrane treadmilling propelled the optogenetically-triggered swimming of a  
391 macrophages cell line, whereas the contributions of protrusions was not assessed. With wild  
392 lymphocytes, we showed experimentally that swimming was barely affected by inhibition of  
393 protrusion waves whereas that swimming speed correlated significantly with disruptions of  
394 membrane treadmilling. Modeling calculations further proved that protrusions travelling at 10-20  
395  $\mu\text{m}/\text{min}$  can not to propel swimming at speeds such elevated as the 5  $\mu\text{m}/\text{min}$  observed for  
396 lymphocytes. In the end, membrane treadmilling is involved in lymphocytes swimming whereas  
397 shape deformations not.

398 Actin dynamics acts as a hybrid motor of membrane treadmilling, powered by polarization and  
399 contractility. Polymerization at the cell front pushes backwards the nascent crosslinked cortical  
400 network, while contractility at the cell rear pulls backwards the network. It is not clear if the two  
401 mechanisms combine their action on a continuous actin gel or if they act independently on two  
402 disconnected actin networks at the cell front and rear. However, we find here that swimming relies  
403 more on frontal actin polymerization than on rear myosin-II contractility. This observation diverges  
404 from recent reports on adherent crawling<sup>21,40,42-45</sup> and swimming<sup>18</sup> cells that attribute a dominant  
405 role to gradient of contractility across cells. Our results are in turn consistent with studies proposing  
406 that contractility is marginally involved in propulsion and mostly relevant for detachment of cell rear  
407 (for *Dictyostelium amoebae*)<sup>46</sup> and squeezing of cell nucleus through pores (for dendritic cells)<sup>5</sup>. In  
408 the end, it remains that membrane treadmilling is propelling leukocytes swimming, whereas  
409 membrane treadmilling itself may be powered either by actin network contractility<sup>18</sup> or actin  
410 polymerization depending on cell type.

411 Hydrodynamic coupling between a treadmilling membrane and a surrounding fluid is the key of  
412 amoeboid swimming, but its characteristics at molecular level have not been precisely considered  
413 experimentally nor theoretically. Studies on motility usually consider that cellular membranes  
414 treadmill as a whole, which theoretically yields a ratio between swimming and membrane speeds  
415 ranging from  $2/3$  to  $1$ <sup>47</sup>. O'neil et al<sup>18</sup> supported the hypothesis of membrane treadmilling as whole  
416 is supported because they measured swimming speeds equal to  $2/3$  of membrane speeds and they  
417 observed front-rear gradients of several membrane components (lipids, and proteins). It can  
418 however be argued that correlations between membranes and cells speeds relied on a limited data  
419 set and that gradients of proteins are not a proof of a direct molecular treadmilling. In contrast, we  
420 find on a large cohort of cells, and after extraction of diffusive motion, that swimming speed of  
421 lymphocyte is significantly too low to arise from propulsion by a homogeneous membrane  
422 treadmilling; swimming speed was  $1/3$  of membrane treadmilling speed (measured with a bead  
423 attached to the membrane) and  $1/5$  of the actin-bound proteins speed. Furthermore, a direct  
424 measurement of transmembrane proteins dynamics revealed a strong heterogeneity in membrane  
425 treadmilling; some molecules treadmilled backwards at high speed and were recycled internally  
426 towards cell front, whereas others were diffusive and not recycled internally toward cell front (Figure  
427 8). Finally, theoretical modelling supports quantitatively that heterogeneous treadmilling of a cell  
428 membrane can account for the slowness of cell swimming as compared to actin treadmilling.

429 Our swimming model sheds also new light on the ubiquitous motility of amoeboid cells. The  
430 adaptation of mammalian amoeboid cells to various environments has repeatedly been attributed to  
431 their capability to switch between different migration modes versus the environment<sup>9,20,22,28,40,48</sup>.  
432 The mode of adherent crawling is generally attributed to a sequence of cell front  
433 protrusion/attachment of and cell rear pulling /detachment, whereas the more intriguing mode of  
434 non-adherent migration in 3D has been explained by various mechanisms depending on cell types<sup>8,22</sup>:  
435 blebbing in the cell front and transfer of actin cytoskeleton into the novel bleb<sup>43,49,50</sup>; intercalation of  
436 protrusion into gaps and discontinuities of the matrix to advance like on a ladder<sup>51,52</sup>; chimneying via  
437 active gel pushing-off the wall<sup>10</sup>; cell rear contractility stabilizing a single bleb conformation<sup>21</sup>; water  
438 permeation throughout the cell body<sup>53</sup> or treadmilling coupled to friction with the substrate<sup>8,11</sup>. In  
439 our case, there was no evidence of a mode switching between crawling and swimming sequences on  
440 patterned substrates. But the adaptation of lymphocytes to various microenvironments may also not  
441 require several modes<sup>9</sup>. The single action of envelope treadmilling can indeed mediate ubiquitous  
442 migration of T lymphocytes in a 3D matrix, on a 2D substrate and in suspension in a fluid, with only  
443 slight difference detectable in terms of speed. As experimentally measured, an adhesive  
444 environment provides strong cell/substratum coupling and cell speeds close to actin treadmilling,

445 whereas a liquid environment provides a partial cell/liquid coupling (due to membrane heterogeneity  
446 and not to environment fluidity) and speeds significantly lower than actin treadmilling.

447 In the end, actin retrograde flow can drive ubiquitous amoeboid migration within fluid and solid, and  
448 with or without non-adherent, however, the physiological role of swimming remains enigmatic for  
449 leukocytes. Since the traffic of immune cells (or invasivity of cancer cells) relies mostly on matrix-  
450 associated migration and swimming is only relevant for planktonic eukaryotic cells (like amoeba), it is  
451 probable that the basic machinery for swimming is an evolutionary conserved ability that has found  
452 novel functions for ubiquitous crawling of mammal cells.



453 FIGURES

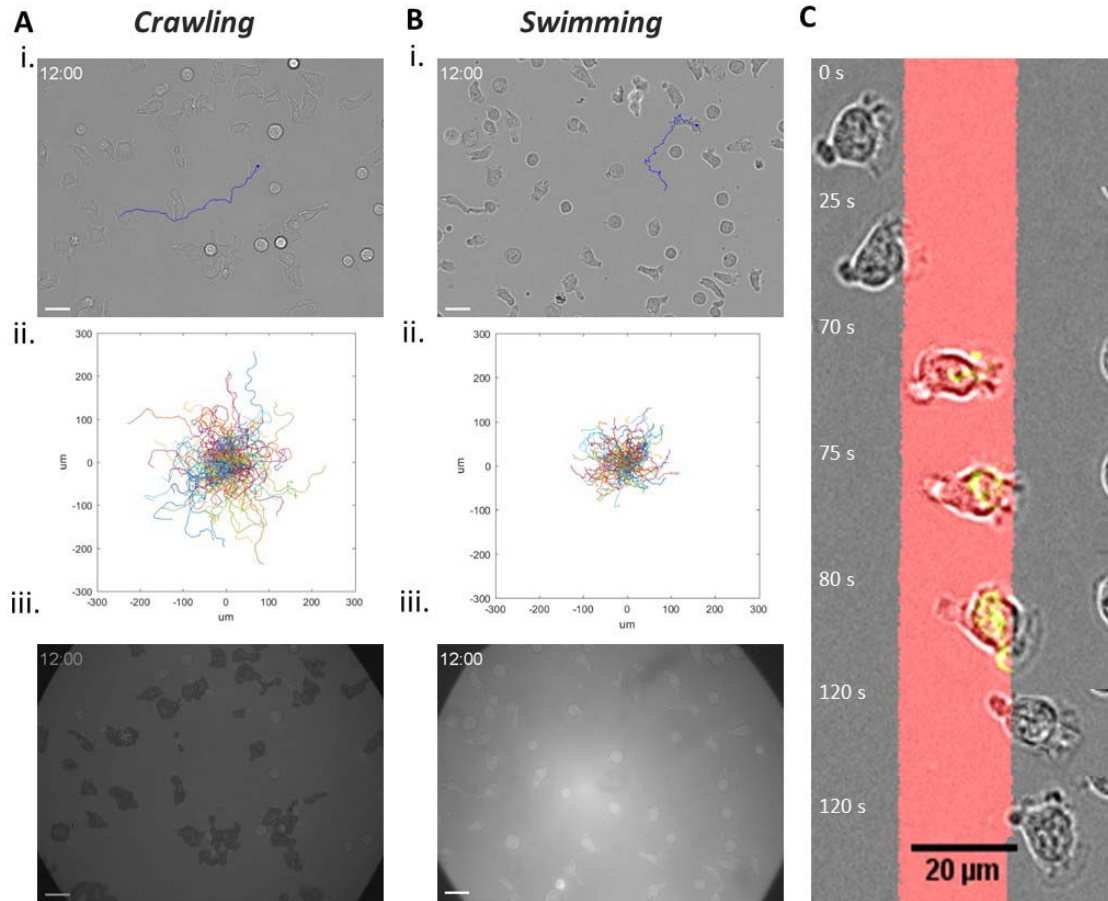

454

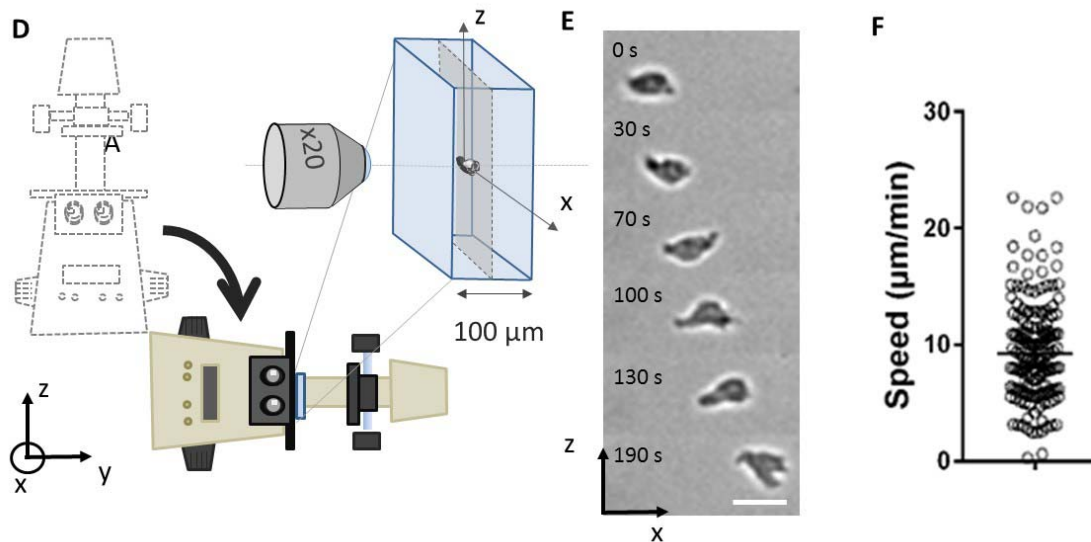

455

456 Figure 1 : **Crawling to Swimming in 2D and 3D displays a single motility mode.** Primary human  
457 effector T cells (A) crawling on adhesive ICAM-1- treated substrate, and (B) swimming on an anti-  
458 adhesive Pluronic F127-treated substrate; i. 63x Bright field images. Blue line correspond to the track

459 of one particular cell (time lag 10 s, duration 12 mn). Scale bar is 20  $\mu\text{m}$ . ii. Representative tracks of  
460 motile cells in a single experiment (time lag = 20 s, duration 16 mn,  $n > 100$  cells). iii. 63x Reflective  
461 Interference Contrast Microscopy (RICM) images. Cell contact zone is dark for cells crawling on ICAM  
462 treated surfaces, revealing an adhesion phenotype (left), and white for cells on non-adhesive surface  
463 attesting the absence of adhesion to the surface. Scale bar is 20  $\mu\text{m}$ . **(C) No apparent transition**  
464 **between crawling and swimming.** Image sequence of cells migrating over adjacent stripes of  
465 adhesive ICAM-1 and anti-adhesive Polyethelenglycol prepared by LIMAP<sup>54</sup> with a width of 20  $\mu\text{m}$ .  
466 The sequence is a merge of fluorescent images (ICAM-1, red), bright field images (greyscale) and  
467 reflection interference contrast microscopy images (adhesion zone, green). Scale bar 20  $\mu\text{m}$ . **(D-E)**  
468 **Swimming in free suspension.** (D) Schematic of the set-up used for suspension swimming analysis  
469 with a microscope tilted by 90° and the flow channel oriented vertically allowing sideways  
470 observation. (E) Sequence of images of a cell swimming in the center of the channel along axis x.  
471 Scale bar 20  $\mu\text{m}$ . **(F)** Velocities of swimming cells for a distance to wall larger than 40  $\mu\text{m}$ .  
472 Nexperiments = 10, Ncells = 15, Nsteps > 200.

473

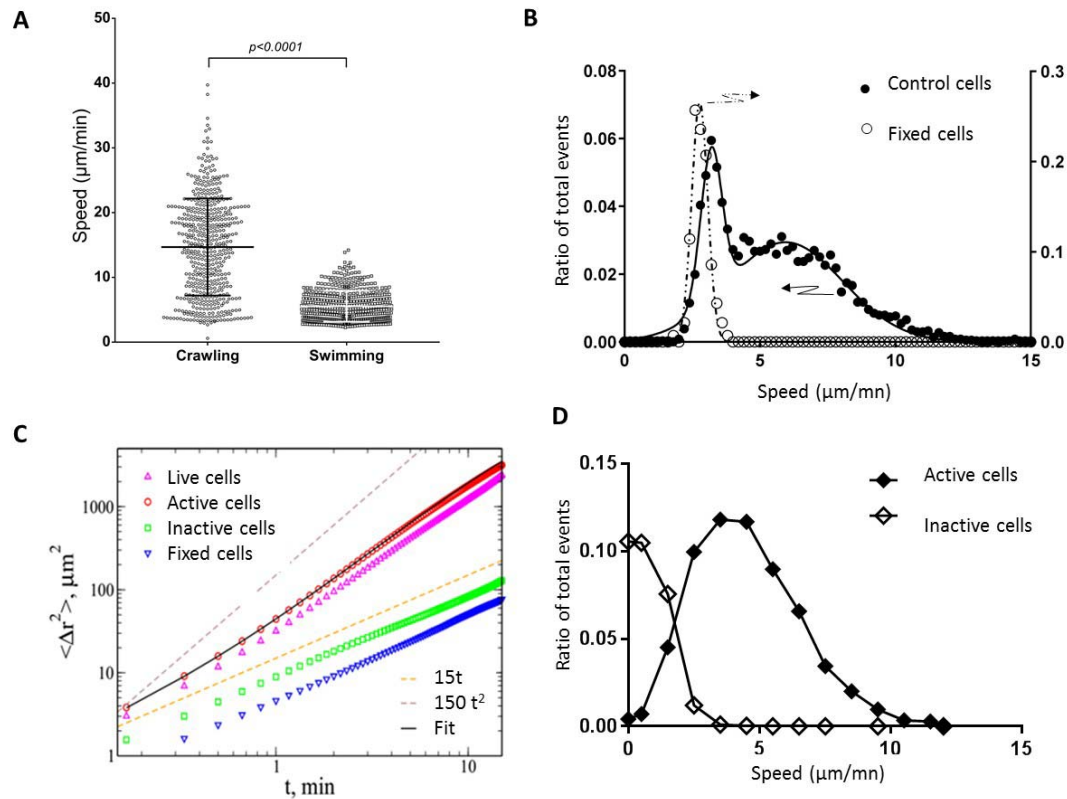

474

475 **Figure 2 : Active swimming propels cells at  $5 \mu\text{m}\cdot\text{s}^{-1}$ .** (A) Raw curvilinear speed of cells crawling on  
 476 adherent ICAM-1-treated substrate and swimming on anti-adherent Pluronic F127-treated substrate,  
 477 estimated by averaging the displacements of cell mass centres over intervals of 30 s.  $N = 500$  cells,  $p$   
 478 value of t test. (B) Histogram of raw curvilinear speed of control swimming cells (filled dots) and fixed  
 479 cells (hollow dots). Data are fitted with a single Gaussian for fixed cells (dotted line) and a double  
 480 Gaussian for control cells (dark line). Live cells are composed of one population of diffusing cells and  
 481 one of swimming cells with an average speed of  $5.9 \mu\text{m}\cdot\text{min}^{-1}$ . (C) Mean square displacement  
 482  $\langle [r(t) - r(0)]^2 \rangle$  as a function of time for all cells and all steps combined in the case of live cells  
 483 (upward pointed triangles) and fixed cells (downward pointed triangles). Fixed cells have purely  
 484 diffusive behavior corresponding to  $D_t = 2.34 \mu\text{m}^2\cdot\text{min}^{-1}$ . Circles and squares show the mean square  
 485 displacement for active and inactive cells, respectively. Black line is a fit of active cells using Equation  
 486 9 (Suppl. Mat.) with  $v_s = 4.3 \mu\text{m}\cdot\text{min}^{-1}$ ,  $D_r = 0.19 \text{min}^{-1}$ , and  $D_t = 7.28 \mu\text{m}^2\cdot\text{min}^{-1}$ . (D) Histogram speed  
 487 measured individually using Equation 1 as in (C) for active cells (filled diamonds) and inactive cells  
 488 (hollow diamonds). Root mean square velocity of active cells is equal to  $4.9 \mu\text{m}\cdot\text{min}^{-1}$ . Lines are  
 489 guides for the eye.

490

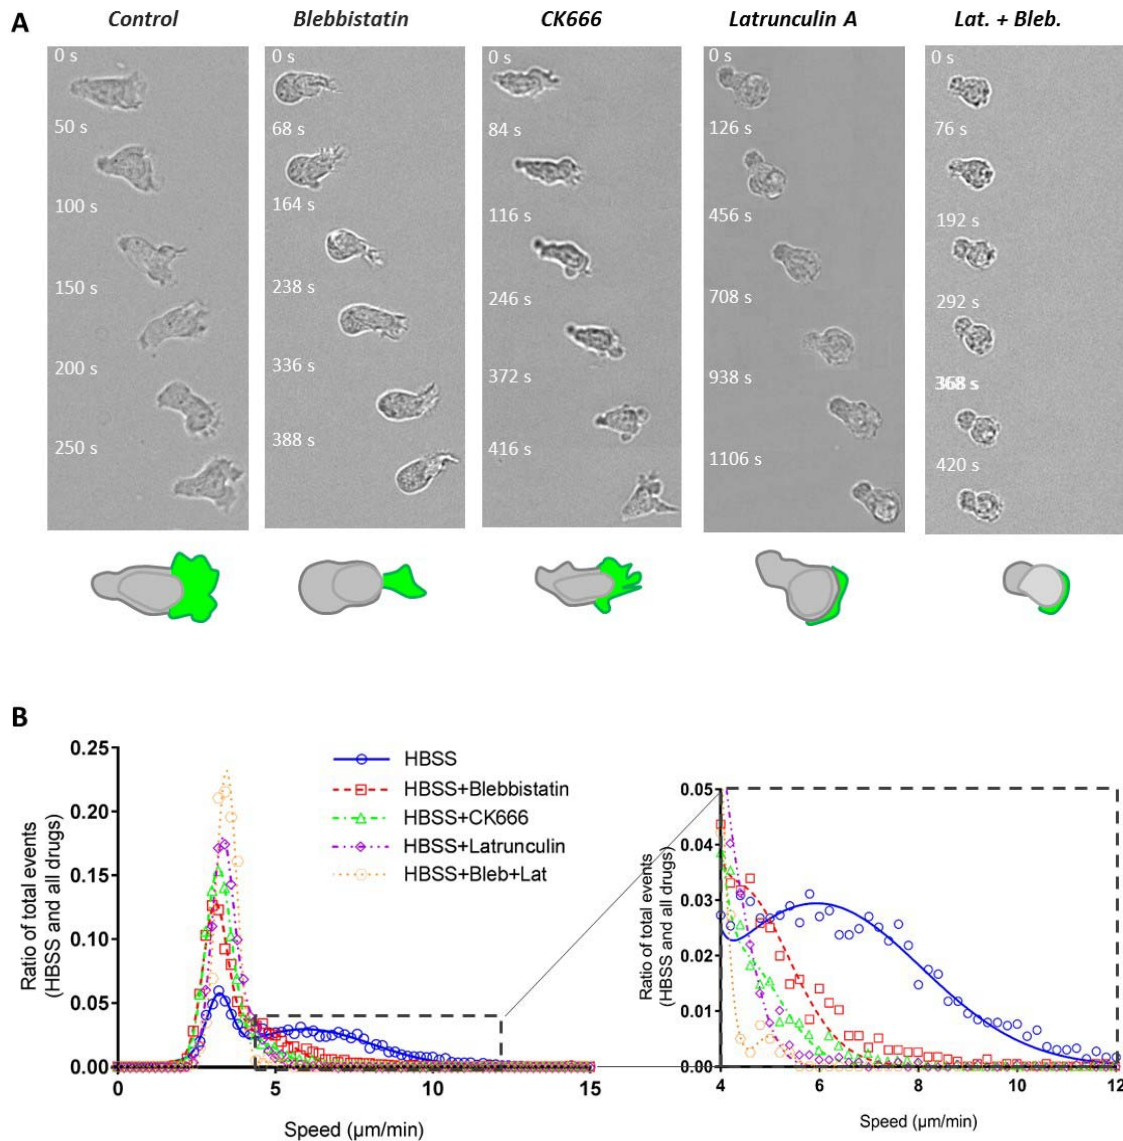

491

492

493 **Figure 3 : Both actin polymerization and contractility propel swimming. (A)** Bright field image  
 494 sequences showing the shape and dynamics of cells swimming on an antiadhesive substrate versus  
 495 addition of actomyosin inhibitors. From left to right: wild type cells, cells treated with 50  $\mu\text{M}$   
 496 blebbistatin, 100  $\mu\text{M}$  CK666, 0.05  $\mu\text{M}$  Latrunculin and combined Latrunculin and Blebbistatin.  
 497 Cartoons at the bottom reproduce the cell in the first image to illustrate in each case the shape of the  
 498 cell body (rear and nucleus) in grey and of the cell front or lamellipodium in green. Blebbistatin-  
 499 treated cells have a roundish cell body without travelling protrusion, and a reduced but active  
 500 lamellipod; CK666-treated cells have a perturbed lamellipod forming blebs and spikes; Latrunculin-  
 501 treated cells have almost no lamellipod. Cells treated with Blebbistatin and Latrunculin have  
 502 a roundish non contractile cell body and no lamellipod (scale bars: 50  $\mu\text{m}$  top, 10  $\mu\text{m}$  bottom). **(C)**  
 503 Histogram of raw curvilinear velocities for swimming cells in response to above mentioned actin  
 504 inhibitors treatments. Insert presents a zoom of the histogram corresponding to the active cells  
 505 Gaussian. Ncells = 4342 (HBSS), 2353 (Blebbistatin), 5582 (CK666), 2255 (Latrunculin), 403  
 506 (Blebbistatin+Latrunculin); Nexperiments > 5.



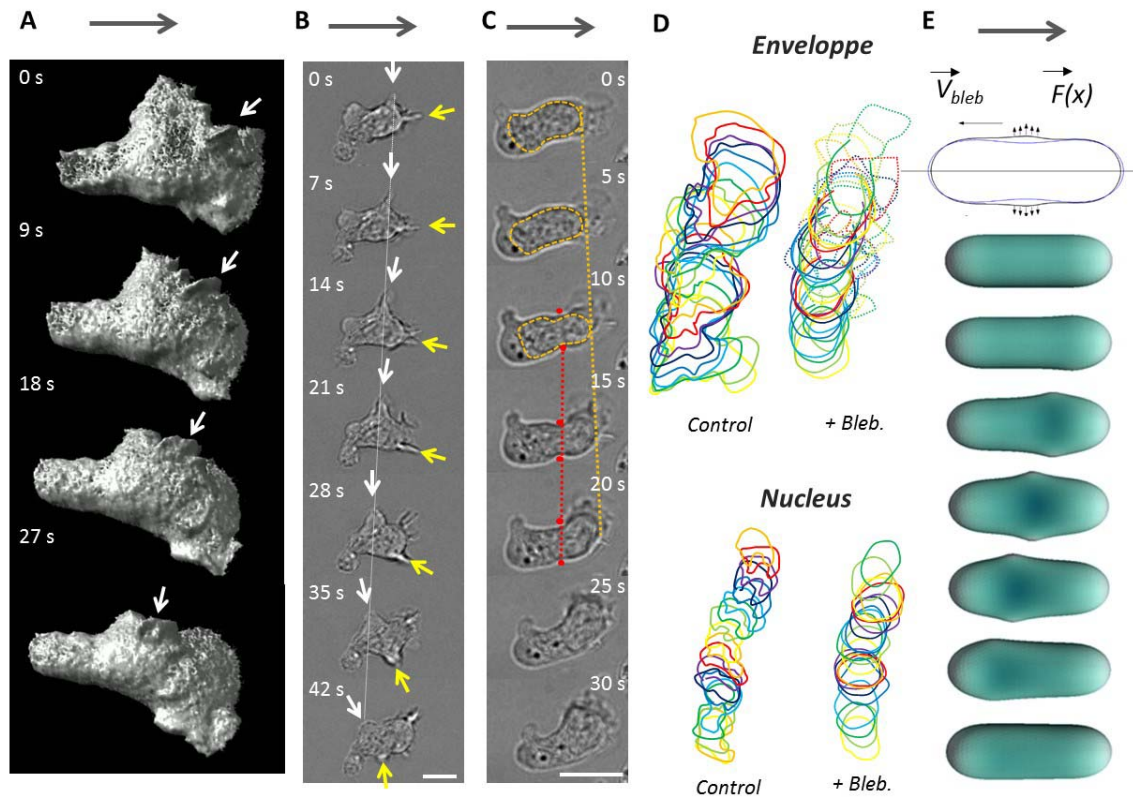

508

509 **Figure 4 : Protrusion paddling does not propel swimming.** (A-C) Images sequence of swimming cell  
 510 with micron scale protrusions travelling along cell body. (A) SoSPIM images of a cell transfected with  
 511 RFP-Lifeact reveals the shape and motion of waves of actin protrusion in three dimensions. White  
 512 arrow points to one particular protrusion. (B,C) Bright field images of a swimming cell showing  
 513 dynamics of protrusions and constrictions along cell body. (B) Protrusions (white and yellow arrows)  
 514 travel backwards in the frame of the cell and of the lab (white dashed line). (C) Constriction ring  
 515 (between the two red dots) are hardly mobile in the frame of the lab (red dashed line), whereas the  
 516 nucleus squeezing through the ring moves forward in the frame of the cell and of the laboratory  
 517 (orange dashed line). Grey arrows indicate swimming direction. Scale bar is 10  $\mu\text{m}$ . (D)  
 518 Representative sequences of the contours of a cell (top) and its nucleus (bottom) for control cells  
 519 (left) and blebbistatin-treated cells (right). For Blebbistatin, the envelope contour is a full line for cell  
 520 rear body and dotted line for the lamellipod. The body and nucleus display strong deformation in  
 521 control cells, and a quasi-static shapes with blebbistatin. Time lag is 10s for control and 15 s with  
 522 blebbistatin. (E) Schematic illustrating the model of cell swimming by protrusive blebs. (Top) Blue  
 523 and black contours are the initial and deformed configurations of the cell in the model. (Bottom)  
 524 Sequence of cell shapes obtained by the numerical simulation. Simulation yield that a cell propelled  
 525 by shape waves that is 1000 times slower than the protrusion wave (details in Suppl. Mat.).

526

527

528

529

530

531

532

533

534

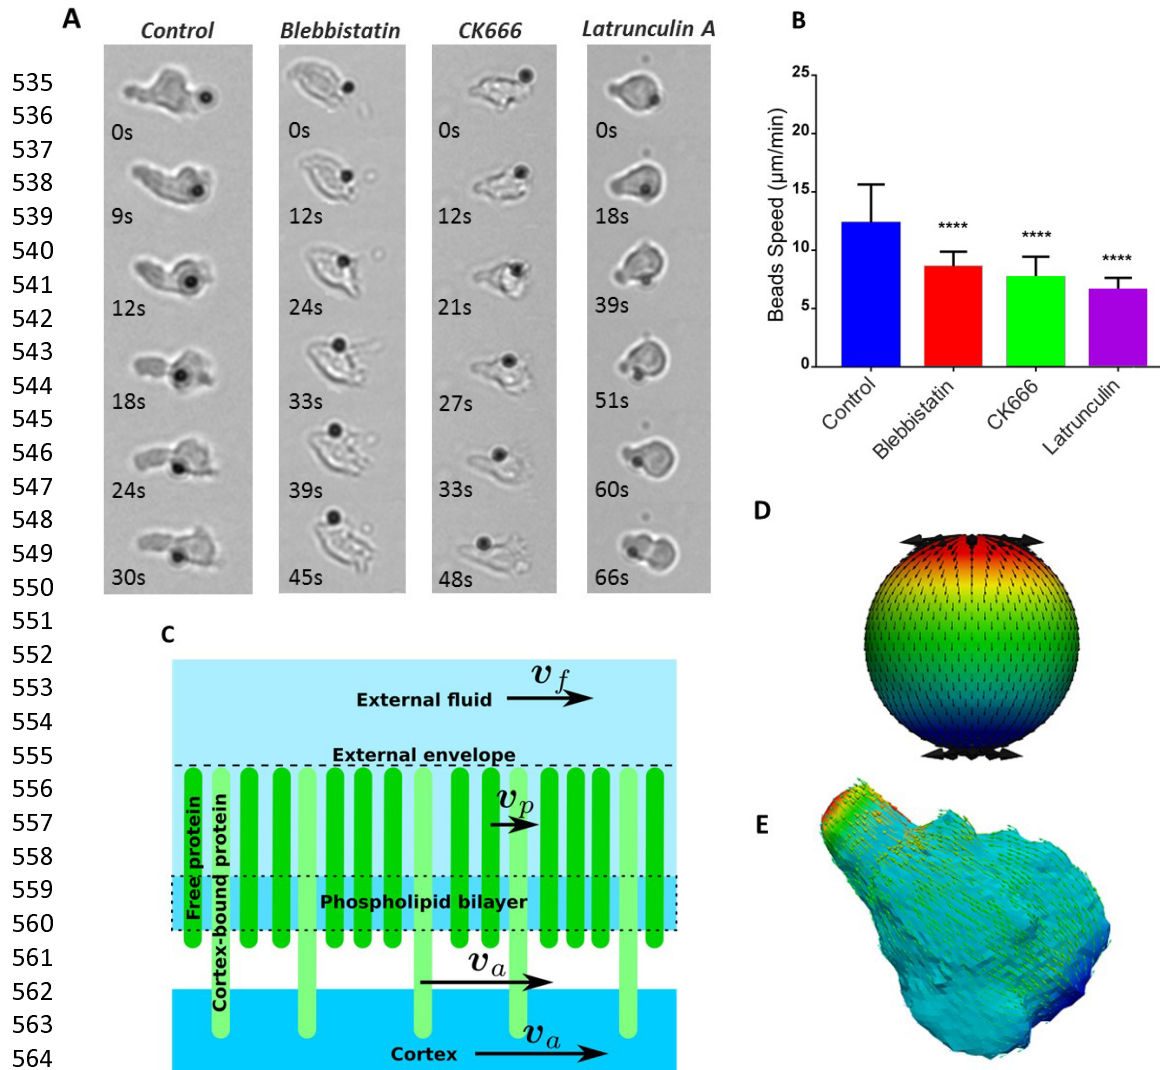

568 **Figure 5 : External envelope retrograde flow propels swimming.** (A) Bright field images of ICAM-  
 569 coated beads travelling from front to back on the cell membrane of swimming primary human  
 570 effector T-cell in HBSS control media, and with 50  $\mu\text{M}$  blebbistatin, 100  $\mu\text{M}$  CK666 and 0.05  $\mu\text{M}$   
 571 Latrunculin A (left to right). Scale bar 10  $\mu\text{m}$ . (B) Travelling speed of ICAM-coated beads versus  
 572 inhibitors type ( $n=17$  cells for each case, error bar is SD, \*\*\*\* :  $p<0.0001$ , Dunnet's multiple  
 573 comparison test vs control condition) (C) Cartoon of the external and internal structure of the cell  
 574 envelope considered in the modeling of membrane dynamics. (D-E) Retrograde flow pattern on a  
 575 model spherical cell (D) and a cell with an experimental shape (E) extracted from soSPIM images of  
 576 (Figure 5-B). Swimming speed is found in both cases equal to the speed of the membrane at equator.

577

578

579

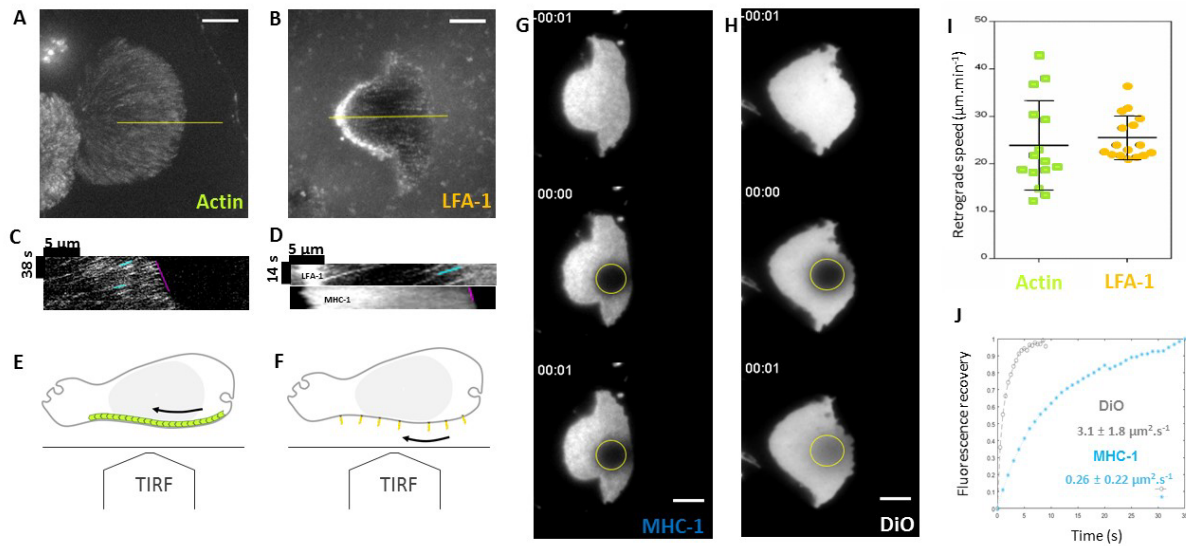

580

581 **Figure 6 : Actin-bound and non-actin-bound transmembrane proteins have different dynamics.**  
 582 **(A,B)** Maximum intensity projection of TIRF sequences on adhesion free cells **(A)** transduced with  
 583 RFP-actin, **(B)** antibody M24 that binds the actin-bound integrin LFA-1 in its high affinity state. **(C,D)**  
 584 Representative kymographs along the yellow line in figures A and B with the front advance  
 585 highlighted in magenta and clusters retrograde flow highlighted in blue . **(E,F)** Schematics  
 586 representing a side view of a non-adherent cells observed with a TIRF objective and highlighting the  
 587 retrograde flow of internal actin (E) and external LFA-1 integrins (F). **(G,H)** TIRF-FRAP experiments on  
 588 adhesion free cells, **(G)** stained with anti-HLA-ABC that binds the non-actin-bound MHC-1 type I  
 589 proteins, and **(H)** with membrane lipidic marker DiO. Yellow circles are frapped regions used to  
 590 calculate fluorescence recovery curves shown in (J). **(I)** Speed values for retrograding actin measured  
 591 by cluster tracking as in (D) (n=7 cells, 51 clusters tracked) and by FRAP as in Suppl. Mat. (n=8 cells)  
 592 and, and for LFA-1 clusters (n=16 cells, 106 clusters tracked), all normalized to the front of the cell. **(J)**  
 593 Averaged FRAP curves for DiO (n=10 cells) and MHC-1 (n=14 cells). All values were normalized and  
 594 corrected by a non-bleached cell. Scale bars 5 μm.

595



596

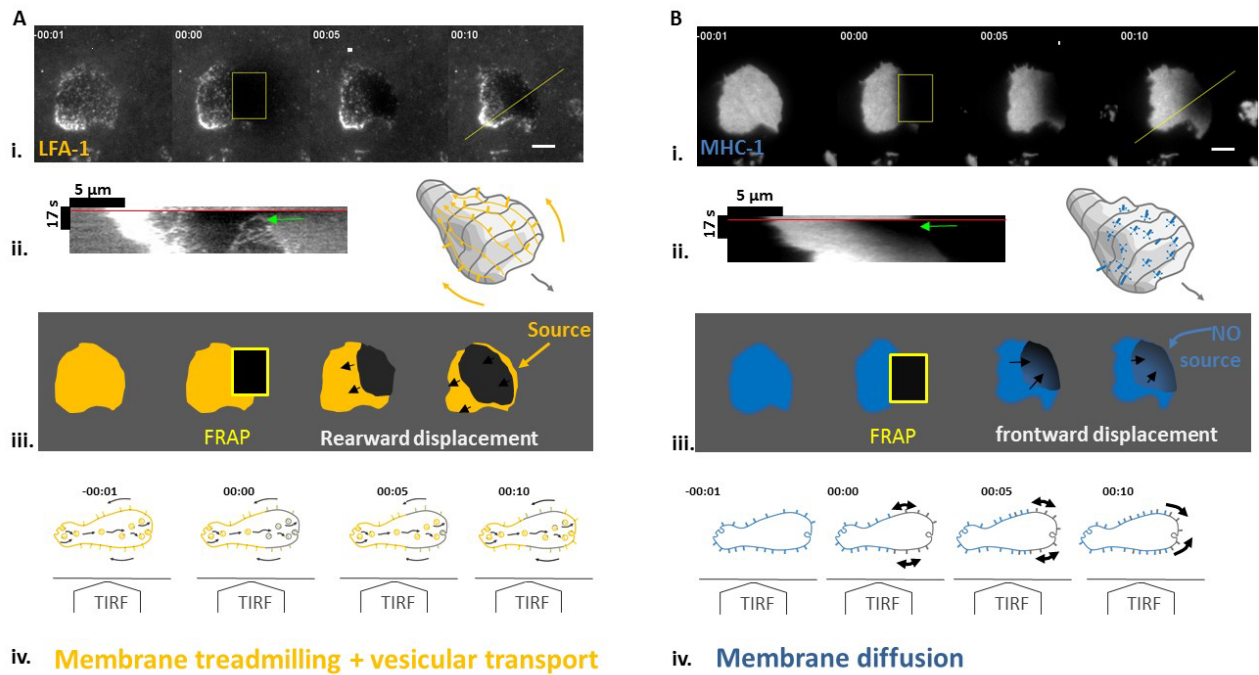

597

598 **Figure 7: Only actin-bound transmembrane proteins are recycled by internal vesicular transport**  
 599 **and external treadmilling advection.** (A) Staining of high affinity LFA-1 and (B) of MHC-1.  
 600 Sequences of TIRF images before FRAP, after frap of cell leading edge, then 5 and 10s after FRAP.  
 601 Scale bar 5  $\mu\text{m}$ . (ii) Kymographs along yellow lines of figures A and B, with red lines indicating FRAP  
 602 time and green arrows pointing at the cell front shortly after FRAP. 3D cartoon illustrate backward  
 603 treadmilling of LFA-1 and 2D diffusion of MHC-1. (iii) Schematics of experimental results in (i.)  
 604 illustrating that fluorescence recovers from the cell leading edge for LFA-1, revealing a source at cell  
 605 front, and from the back for MHC-1 revealing the absence of source at cell front. (iv) Side view  
 606 schematics a non-adherent cells observed with a TIRF objective illustrating the dynamics of  
 607 transmembrane proteins evidenced in TIRF experiments. For actin-bound LFA-1, source at cell front  
 608 reveals internal frontward transport of fresh material exocytosed at cell front, whereas for non-actin  
 609 bound MHC-1, purely diffusive transport dominates (H).

610

611

612

613

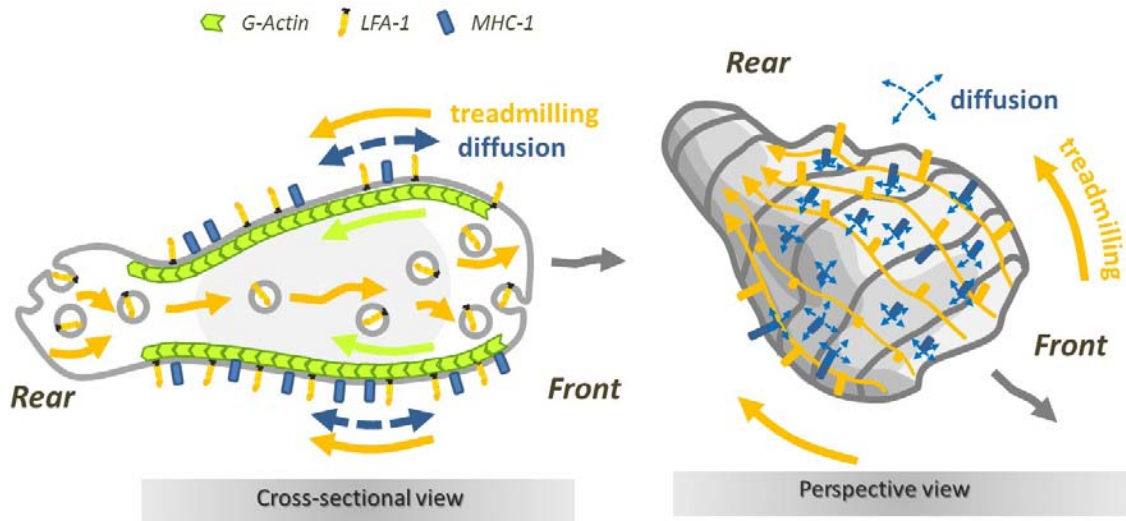

614

615 **Figure 8 : Slow swimming is modeled by a partial coupling of fast actin treadmilling motion to a**  
616 **fraction of transmembrane proteins recycled from rear to front by internal transport.** (A) Cross  
617 sectional view. The complete cycling of actin-bound proteins (here LFA-1, yellow) comprises  
618 endocytosis at cell rear, internal forward advection by vesicles, exocytosis at cell front and advection  
619 at cell membrane by linkage to retrograde actin flow (green). Non-actin bound proteins (here MHC-1,  
620 blue) are mostly diffusing at cell surface. (B) Perspective view of a swimming cell with actin-bound  
621 proteins advected backwards (yellow), entangled with non-actin bound proteins. Molecular paddling  
622 resulting from interactions between external fluid, and actin-bound and non-actin-bound proteins  
623 yields a speed significantly lower than actin according to our theoretical model and experimental  
624 data.

## 625 **Supplementary information**

### 626 **Supplementary movies**

627 **Movie 1 : From Crawling to Swimming in the vicinity of a substrate.** (Left) Crawling on adhering  
628 ICAM-1-treated substrate. (Right) Swimming on Pluronic<sup>®</sup> F127 treated surface. First sequence, 20x  
629 bright field transmission microscopy, then 63x bright field transmission microscopy and finally x63  
630 reflected interference contrast microscopy.

631 **Movie 2 : 3D imaging of primary human effector T cell swimming in spinning disk microscopy.**  
632 Videomicroscopy sequence of swimming T cells stained with CMFDA (5-chloromethylfluorescein  
633 diacetate) on Pluronic<sup>®</sup> F127 treated surface for 14 min 40 sec with a time lapse every 20 s and 10  
634 slices every 1  $\mu\text{m}$ . Some unpolarized cells do not swim. The arrow points a polarized and swimming  
635 cell that crosses the whole field of view. Scale bars in  $\mu\text{m}$  indicated on axis, magnification: 63X.

636 **Movie 3 : Immediate transition between crawling and swimming.** Migration on alternative 40  $\mu\text{m}$   
637 wide stripes of adherent ICAM-1 and non-adherent Pluronic<sup>®</sup> F127 prepared by LIMAP<sup>31</sup>.  
638 Superposition of fluorescent image (ICAM-1, red), bright filed transmission image (greyscale) and  
639 reflection interference contrast microscopy image (bright green corresponds to cells adhesion  
640 fingerprints) taken at 63x. Scale bar 20  $\mu\text{m}$ .

641 **Movie 4 : Swimming in bulk suspension.** Movie of two cells suspended in a medium of matched  
642 density using a microscope tilted by 90° and a flow cell oriented vertically for sideway observations.

643 **Movie 5 : Role of actomyosin network in swimming motion.** Movies in bright field at 63x of primary  
644 human effector T cells swimming on an antiadhesive substrate in the presence of actin inhibitors:  
645 control, 50  $\mu\text{M}$  blebbistatin, 100  $\mu\text{M}$  CK666 or 0.05  $\mu\text{M}$  Latrunculin. Scale bar 20  $\mu\text{m}$ .

646 **Movie 6 : 3D imaging of primary human effector T cell swimming in so-SPIM mode.** Video  
647 microscopy movie of RFP-Lifeact transfected cells, showing lamellar-protrusion forming with random  
648 orientation in cell front and travelling backwards at around 10  $\mu\text{m}\cdot\text{min}^{-1}$ .

649 **Movie 7 : Rearward travelling shape deformations.** Bright field videomicroscopy at 63x of primary  
650 human effector T cells swimming on an antiadhesive substrate and showing protrusion retrograde  
651 motion, nucleus squeezed forward through constricted rings. Scale bars 10  $\mu\text{m}$ .

652 **Movie 8 : Swimming of a cell by the motion of two blebs on the cell surface.** The color here  
653 represents the mean curvature of the cell surface.

654 **Movie 9 : Cell envelope retrograde flow revealed by attached beads.** Bright field videomicroscopy of  
655 ICAM-coated beads travelling from front to back on the cell membrane of swimming T-cells in HBSS  
656 control media, 50  $\mu\text{M}$  blebbistatin, 100  $\mu\text{M}$  CK666 or 0.05  $\mu\text{M}$  Latrunculin A. Scale bars 50  $\mu\text{m}$ .

657 **Movie 10 : Numerical simulation of swimming by retrograde flow.** Cell shape is extracted from  
658 experiments. The swimming is shown in the laboratory frame. Color code on the surface represents  
659 the production/consumption of the cortex material. Small spheres are fictitious tracers moving with  
660 the cortex velocity. Transmission coefficient  $\beta = 1$ .

661 **Movie 11 : Molecular analysis of the dynamics of cell external envelope by TIRF-FRAP.** TIRF-FRAP  
662 experiments on primary human effector T-cell (Top left) transfected with a GFP-Actin by lentiviral  
663 infection, (Top right) stained with membrane lipidic marker DiO, (Bottom left) stained with antibody  
664 Mab24 that binds an actin-bound protein, the integrin LFA-1 in its high affinity state, and (Bottom

665 right) stained with anti-HLA-ABC that binds the non-actin-bound MHC-1 type I proteins. Scale bars 5  
666  $\mu\text{m}$ .

667 Movie 12 : **Cytoskeleton retrograde flow**. TIRF imaging of a primary human effector T lymphocyte  
668 transfected with GFP-Actin and displaying backward travelling of clusters. Scale bar 5  $\mu\text{m}$ .

669 Movie 13 : **Evidence of internal recycling at the cell front for advected protein LFA-1 and not for**  
670 **diffusive protein MHC-1**. TIRF-FRAP experiments on primary human effector T-cell (Right) stained  
671 with antibody Mab24 that binds the actin-bound proteins LFA-1 in high affinity state, and (Left)  
672 stained with anti-HLA-ABC that binds the non-actin-bound proteins MHC-1. The cell front is frapped  
673 and fluorescence recovers only from the front for LFA-1, in agreement with an internal vesicular  
674 recycling of integrins from back to front, and only from the rear for HLA, in accord with a surface  
675 diffusion mechanism.

676

677

## 678 **Supplementary information on experimental results**

### 679 *Experimental swimming velocities are independent of medium viscosity increase up to 100 times*

680 Hydrodynamic interactions between an amoeboid lymphocyte and a fluid are sufficient to promote  
681 momentum transfer. In order to test if the viscosity of the medium influences the efficiency of cell-  
682 fluid coupling, we performed swimming experiments in culture medium supplemented with dextran  
683 of molecular weights 2,000 kDa to increase its viscosity up to 100 times. Viscosity of solutions were  
684 measured on a Bohlin Gemini 150 rheometer equipped with cone-plate geometry (cone angle 20° ,  
685 diameter 60 mm) at T=22°C. The change of osmotic pressure and change of viscosity (Figure S 1 -A)  
686 had no significant effect on swimming velocity in the explored range (Figure S 1 -B). This observation  
687 is consistent with predictions of the model for swimming propelled by cell envelope retrograde flow.

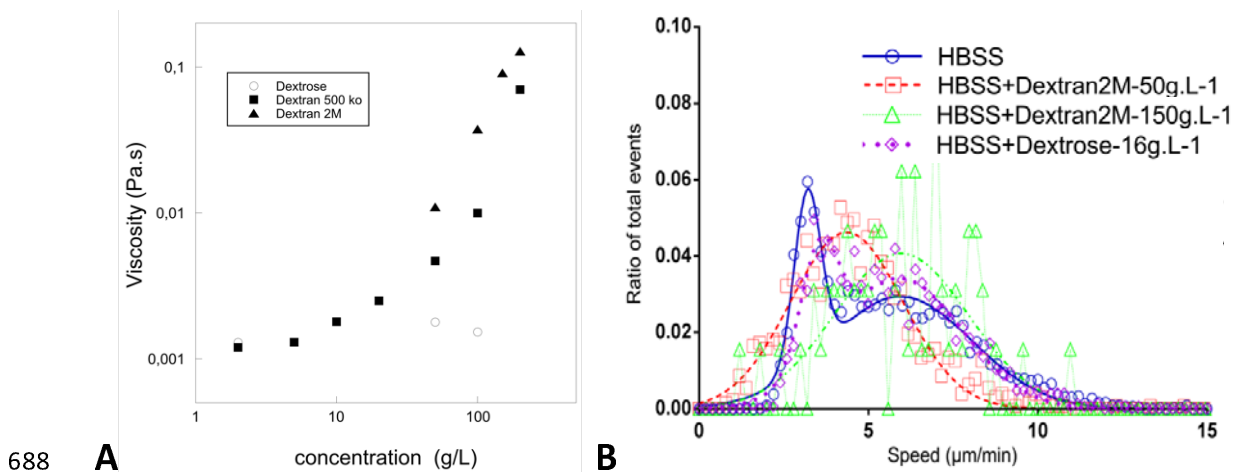

688

689 **Figure S 1 : Cell speed is independent of the medium viscosity. (A)** Viscosity of Dextran and dextrose  
690 solutions in HBSS versus concentration. **(B)** Histogram of raw curvilinear velocities for cells in normal  
691 medium and medium with viscosity increased 10 x (Dextran 2,000 kDa at 50g/L) and 100 x (Dextran  
692 2,000 kDa at 150g/L) and osmotic control condition (Dextrose 16g/L). Data for increased viscosity  
693 cases are fitted with a single average speed of 4.4  $\mu\text{m}\cdot\text{min}^{-1}$  and 6.0  $\mu\text{m}\cdot\text{min}^{-1}$  for 10x and 100x  
694 increased viscosity condition respectively. Data for osmotic control are fitted with a double Gaussian  
695 with an average speed of 5.9  $\mu\text{m}\cdot\text{min}^{-1}$  for the active swimming cells. Ncells = 4342 (HBSS), 1262  
696 (Dextran 50  $\text{g}\cdot\text{L}^{-1}$ ), 64 (Dextran 150  $\text{g}\cdot\text{L}^{-1}$ ), 1449 (Dextrose); Nexperiments = 5 (HBSS), 3 (Dextran 50  
697  $\text{g}\cdot\text{L}^{-1}$ ), 3 (Dextran 150  $\text{g}\cdot\text{L}^{-1}$ ), 2 (Dextrose).

698

699 **Quantification of LFA-1 and VLA-4 expression on effector T cells.**

700 Quantification LFA-1 and VLA-4 number per cell was performed by quantitative cytometry (  
701 Figure S 2) and yielded an average number per cell of 25000 for LFA-1 and 13000 for VLA-4.  
702

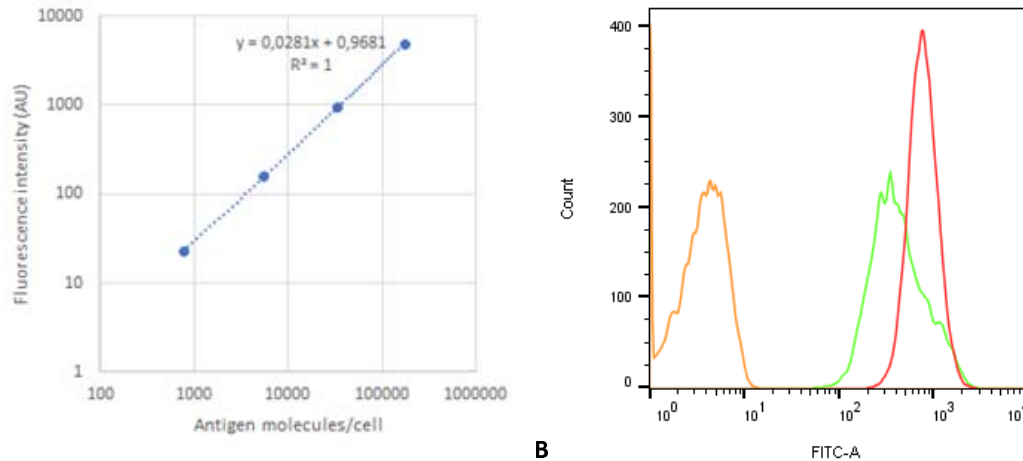

703 **A** **B**  
704 Figure S 2 : (A) Calibration curves with the secondary antibody and calibration beads (CellQuant  
705 calibrator kit , ref 7208, Biocytex) (B) fluorescence histograms of T cells stained by indirect  
706 immunofluorescence with specific monoclonal antibodies (CD49d (HP2/1) for VLA-4 and CD11a  
707 (Hi111) for LFA-1).

708

709

710 **Supplementary Table**

711 **Table 1 : Swimming velocity versus the effects of cell fixation, medium viscosity change and actin**  
 712 **inhibitors addition.** The table reports the raw swimming velocity estimated by averaging the instant  
 713 curvilinear speeds between two positions of cell mass center separated by 30s for each cell. Average  
 714 raw velocities of active and passive cells as well as fraction of active cells are estimated from by a fit  
 715 of velocities histograms by a double Gaussian (Figure 2-B). Velocity errors correspond to standard  
 716 deviation. Cell number correspond to the number of cells considered for each experimental  
 717 condition.

| Condition      | Active cells                          |          | Passive cells                         | Number of cells |
|----------------|---------------------------------------|----------|---------------------------------------|-----------------|
|                | ( $\mu\text{m}\cdot\text{min}^{-1}$ ) | Fraction | ( $\mu\text{m}\cdot\text{min}^{-1}$ ) |                 |
| HBSS-CTRL      | 5.9 ± 2.1                             | 78%      | 3.2 ± 0.4                             | 4342            |
| Blebbistatin   | 4.3 ± 1.1                             | 45%      | 3.1 ± 0.4                             | 2353            |
| CK666          | 4.4 ± 0.8                             | 21%      | 3.2 ± 0.4                             | 5582            |
| Latrunculin    | 4.2 ± 0.5                             | 20%      | 3.3 ± 0.4                             | 2255            |
| Bleb. + Lat.   | 5.0 ± 0.3                             | 2%       | 3.4 ± 0.3                             | 403             |
| HBSS-PFA       | -                                     | -        | 2.8 ± 0.3                             | 139             |
| Viscosity 10x  | 4.4 ± 1.6                             | NA       | -                                     | 1262            |
| Viscosity 100x | 6.0 ± 2                               | NA       | -                                     | 64              |
| Dextrose       | 5.9 ± 1.8                             | 80%      | 3.6 ± 0.6                             | 1449            |
| Visco 10x-PFA  | -                                     | -        | 0.27 ± 0.09                           | 30              |
| ICAM-1         | 14.6 ± 7.5                            | -        | -                                     | 503             |

718

719

720

## 721 Supplemental information on theory and simulations

### 722 *Cell diffusion and persistent swimming: Model*

723 We model the motion of the cells as a combination of deterministic swimming and random noise.  
 724 The swimming velocity  $v_s = v_s p$  is assumed to have a constant absolute value but the orientation  
 725 vector  $p$  can vary in time. The random noise here consists of translational diffusion with diffusion  
 726 coefficient  $D_t$  and rotational diffusion with angular diffusion coefficient  $D_r$ . This noise accounts both  
 727 for thermal fluctuations and for the active dynamics of the cell. Since cells are swimming close to a  
 728 wall, the dynamics of orientation  $p$  and position  $r$  of the swimmer are effectively two-dimensional.  
 729 The model described above belongs to a broad class of persistent random walk problems, which have  
 730 enjoyed a lot of attention in the literature<sup>55</sup>. We therefore give here only a brief overview of the  
 731 solution process and the final expression of the mean square displacement of the cell as a function of  
 732 time and the model parameters.

### 733 *Cell diffusion and persistent swimming: Solution*

734 We first calculate the correlation  $\langle p(t_0) \cdot p(t) \rangle$ . The probability density function  $\psi(p, t)$  for the  
 735 swimmer to have orientation  $p$  at time  $t$  satisfies the following equation:

736 Equation 4 
$$\psi(p, t) = D_r \nabla_p^2 \psi(p, t).$$

737 where  $\nabla_p \equiv (I - p \otimes p) \cdot \partial_p$  is the gradient operator on a unit circle representing possible  
 738 orientations of  $p$ , and  $I$  is the identity matrix. The right hand side of Equation 4 expresses the angular  
 739 diffusion process. If  $p(t_0) = p_0$ , the initial condition for Equation 4 is

740 Equation 5 
$$\psi(p, t_0) = \delta_p(p - p_0),$$

741 where  $\delta_p$  is the Dirac function. Equation 4 is solved by expanding  $\psi(p, t)$  in Fourier harmonics of  $p$ ,  
 742 which represents the eigenfunctions of the Laplace operator  $\nabla_p^2$ :

743 Equation 6 
$$\psi(p, t) = 1 + \psi_i(t)p_i + \psi_{ij}(t)p_i p_j + \dots,$$

744 where  $\psi_{ij}(t)$  and so on are symmetric and traceless. The quantity of interest here is  $\psi_i(t) =$   
 745  $2\langle p_i(t) \rangle$ . Substituting Equation 6 into Equation 4 yields  $\psi_i(t) = \psi_i(t_0) \exp[D_r(t - t_0)]$  for  $t \geq t_0$ ,  
 746 resulting in

747 Equation 7 
$$\langle p(t_0) \cdot p(t) \rangle = p(t_0) \cdot \langle p(t) \rangle = e^{-D_r|t-t_0|}.$$

748 The displacement due to persistent motion is calculated by integrating Equation 7:

749 Equation 8

$$\partial_t \langle [r(t) - r(t_0)]^2 \rangle = 2 \langle v_s(t) \cdot [r(t) - r(t_0)] \rangle = 2 \int dt' \langle v_s(t) \cdot v_s(t') \rangle = 2v_s^2 \frac{1 - e^{-D_r|t-t_0|}}{D_r}.$$

750 Integrating Equation 8 and adding the contribution of the translational diffusion yields



751 Equation 9 
$$\langle [r(t) - r(t_0)]^2 \rangle = \frac{2v_s^2}{D_r} \left( |t - t_0| + \frac{e^{-D_r|t-t_0|-1}}{D_r} \right) + 4D_t|t - t_0|.$$

752 Equation 9 reduces to Equation 1 for  $tD_r \ll 1$ .

753

754 **Model of swimming by wave of shape deformation**

755 In order to simulate the bleb-driven swimming of the cells, we model the cell as an elastic capsule, to  
756 which active forces are applied, while maintaining the zero net force and torque conditions (Figure S  
757 3). Application of the active force density concentrated in small regions of the cell surface results in  
758 the formation of bleb-like protrusions. Further, the location at which the active forces are applied is  
759 moved with a prescribed velocity  $v_{bleb}$  along the surface of the cell. In addition to the magnitude of  
760 the active force and the bleb velocity, the life-time of the blebs  $T_{bleb}$ , which describes the duration  
761 for which the active force is applied, is also an important parameter. This application of time  
762 dependent active force leads to formation and movement of the blebs along the cell surface. The  
763 swimming velocity is obtained by solving the hydrodynamic problem in fluids inside and outside the  
764 cell, as described below.

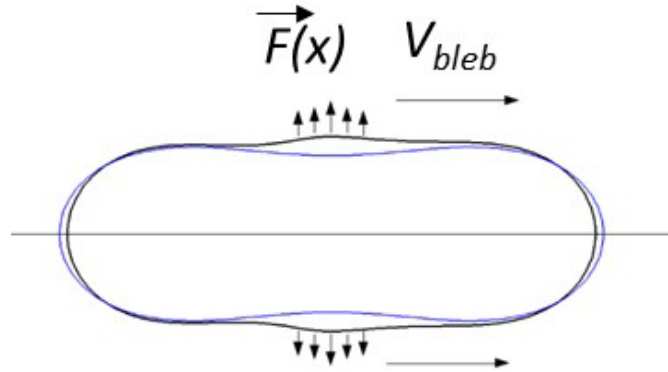

765

766 Figure S 3 : Schematic of a swimming cell by protrusive blebs. Blue and black contours are the initial  
767 and deformed configurations of the cell, respectively.

768

769 The configuration of the cell during the course of a bleb formation and motion is shown in Figure 4-D.  
770 The maximum size of the blebs for different values of active force amplitudes is shown in Figure S 4  
771 and and the velocity of the cell by the bleb motion in Figure S 4-B. For all the simulations  $v_{bleb}$  was  
772 fixed at 0.02 and force amplitude  $F$  was varied. The plot shows that in bleb-driven swimming, the cell  
773 velocity  $v_{cell} \sim 10^{-3} v_{bleb}$ . Furthermore, the dependence of the swimming velocity on the force  
774 amplitude is  $v \sim F^2$ .  
775

776

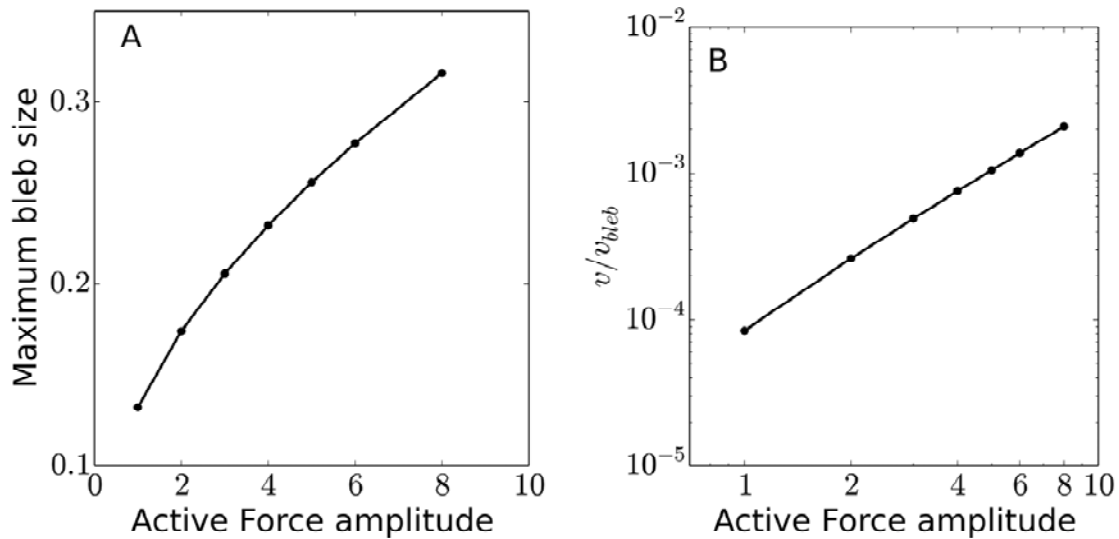

777

778

779 Figure S 4 : (A) Maximum size of the blebs for different values of active force amplitudes (see Figure

780 S 3). (B) Dependence of average cell velocity  $v_{cell} 10^{-3} v_{bleb}$  on the active force amplitude. Here the

781 bleb velocity relative to the cell center has been kept fixed at  $v_{bleb} = 0.02$ .

782

783

#### 784 **Model of swimming by envelope retrograde flow: Actin cortex flow**

785 Actin polymerization expands the cortex in the front region of the cell, whereas myosin-induced

786 contractility and actin depolymerization consume the cortex in the rear region of the cell. Between

787 these regions, the actin moves from front to back along the cell membrane. An overpressure of the

788 cortex at cell front due to actin accumulation and an underpressure at cell rear due to myosin-

789 induced contraction can both contribute to forces driving the retrograde flow of the cortex. We thus

790 model the driving force as the pressure gradient along the cell surface,  $\nabla^S P$ , where  $P$  is the pressure

791 field and  $\nabla^S$  is the surface gradient operator. This gradient implies a net cortex flow field  $v_a(r)$

792 which, in a simple approximation, can be taken locally proportional to the driving force:

793 Equation 10 
$$v_a(r) = -\mu \nabla^S P(r)$$

794 Where  $\mu$  is a mobility coefficient. Here we assume that the shape is fixed so that the flow is

795 tangential to the surface in the reference frame comoving with the cell. By choosing an appropriate

796 pressure field, Equation 10 can be proven to be exact for any axisymmetric flow (see below). It is

797 interesting to note that Equation 10 is identical to the Darcy law, valid in a porous medium or a Hele-

798 Shaw flow. The cortex region could be viewed as a thin layer, a curved Hele-Shaw geometry, hence

799 Equation 10 can be inferred from classical hydrodynamics. Equation 10 is closed by the mass  
800 conservation equation:

801 Equation 11 
$$\nabla^S \cdot v_a(r) = \psi_p(r) - \psi_d(r)$$

802 Here we express the change of the local 2D concentration of actin (per cortex area) due to the  
803 advection by the flow (the left hand side) through the local rate polymerization  $\psi_p(r)$  (source) and  
804 the local rate of depolymerization  $\psi_d(r)$  (sink).  $\psi_p(r)$  and  $\psi_d(r)$  are zero everywhere except in a  
805 small domain localized in the front and rear regions of the cell, respectively. Substituting Equation 10  
806 into Equation 11 gives an equation for  $P$  which can be solved. Once  $P$  is determined the actin flow  
807 field  $v_a(r)$  can be obtained from Equation 10.

808 ***Model of swimming by envelope retrograde flow: actin flow in an axisymmetric case***

809 The purpose is to show that for axisymmetric cells Equation 10 holds automatically. The cell shape  
810 and the actin velocity can be parametrized in cylindrical coordinates as

811

812 Equation 12 
$$r(s, \varphi) = (\rho(s)\cos(\varphi), \rho(s)\sin(\varphi), z(s)),$$

813 Equation 13 
$$v_a(s, \varphi) = v_a(s)\partial_s r(s, \varphi)$$

814

815 where  $s$  is the arclength measured from the front pole of the cell,  $\varphi$  is the polar angle,  $\rho(s)$  and  $z(s)$   
816 are shape functions, and  $\partial_s r(s, \varphi)$  is the tangent vector along the meridian. The properties of  $s$  are  
817 such that  $|\partial_s r(s, \varphi)| = 1$ . Equation 10 can be easily verified if we define  $P(s, \varphi)$  as

818 Equation 14 
$$P(s, \varphi) = -\frac{1}{\mu} \int v_a(s') ds'$$

819

820 ***Model of swimming by envelope retrograde flow: Exact solution for a spherical swimmer***

821 The actin flow can be obtained explicitly for a spherical cell having a point source of actin  $\psi_p(r) =$   
822  $2Rv_0\delta(r - r_N)$  at the North Pole  $r_N$  and a point sink  $\psi_d(r) = 2Rv_0\delta(r - r_S)$  at the South Pole  $r_S$ .  
823 Here  $R$  is the sphere radius and  $v_0$  is a constant having a dimension of velocity that turns out to be  
824 equal to the retrograde flow velocity at the equator in the cell frame. We present the solution in  
825 spherical coordinates. Defining the origin as the center of the swimmer and the polar direction as  
826 source point of actin, we write the velocity at a point  $(R\sin\theta\cos\varphi, R\sin\theta\sin\varphi, R\cos\theta)$  as

827 Equation 15 
$$v(\theta, \varphi) = \left( v_0 \frac{\cos\theta}{\sin\theta} \cos\varphi, v_0 \frac{\cos\theta}{\sin\theta} \sin\varphi, -v_0 \right),$$

828 where  $\theta$  is the azimuth angle. The corresponding actin pressure is written as

829 Equation 16 
$$P(\theta, \varphi) = \frac{v_0}{2\mu} \ln \frac{1+\cos\theta}{1-\cos\theta}$$

830 The swimming velocity is then given by  $v_s = \beta v_0$ .

831

### 832 ***Flow outside the cell***

833 Since the Reynolds number in the problem is extremely low, the flow  $v_f$  in the fluid outside the cell  
834 envelope satisfies the Stokes equations:

835 Equation 17 
$$\eta_0 \nabla^2 v_f - \nabla p = 0, \quad \nabla \cdot v_f = 0,$$

836 where  $\eta_0$  is the viscosity of the suspending medium. Equation 17 are solved together with the  
837 boundary conditions given by  $v_f = 0$  at infinity and Equation 2 of the main text. The unknowns  $v_s$   
838 and  $\omega_s$  are solved for from conditions:

839 Equation 18 
$$\int F dA = 0,$$

840 Equation 19 
$$\int F \times r dA = 0,$$

841 where  $F$  is the surface force density applied locally by the fluid to the cell,  $dA$  is the area element  
842 and integrals are taken over the boundary of the cell envelope. Equation 18 and Equation 19 express  
843 that no external forces or torques act on the swimmer. The forces  $F$  can be expressed through the  
844 viscous stress tensor  $\sigma$  of the fluids

845 Equation 20 
$$F_i = -\sigma_{ij} n_j, \quad \sigma_{ij} = \eta_0 (\partial_i v_{fj} + \partial_j v_{fi}) - p \delta_{ij},$$

846 where  $n$  is the outward normal to the boundary of the cell. It follows from the linearity of Equation  
847 17 and Equation 2 of the main text that for any  $a$ , if  $v_f$ ,  $v_s$ ,  $\omega_s$ ,  $\sigma$ ,  $F$ , and  $p$  represent a solution of the  
848 problem for a given cell shape,  $v_a$  and external fluid viscosity  $\eta_0$ , then  $v_f$ ,  $v_s$ ,  $\omega_s$ ,  $a\sigma$ ,  $aF$ , and  $ap$   
849 represent a solution of the problem for the same shape,  $v_a$  and external fluid viscosity  $a\eta_0$ . This  
850 implies that changing viscosity of the suspending medium does not affect the swimming velocity for  
851 the same velocity of the retrograde flow and the same transmission coefficient  $\beta$ . This result is  
852 consistent with experimental observations (cf. Suppl. Mat., Figure S 1 and “Experimental swimming  
853 velocity are independent of medium viscosity increase up to 100 times”).

### 854 ***Model of swimming by envelope retrograde flow: Numerical method for any swimmer***

855 We parametrized the surface of the cell obtained in experiments by a triangular mesh. The Laplace  
856 equation for  $P$  (Equation 10 substituted in Equation 11) was solved by finding a stationary solution of

857 a diffusion equation. The flow in the suspending fluid was solved for using the boundary integral  
858 formulation. The details of the numerical procedure and the validation are given in <sup>56</sup>.

859

860

861

862

863 ***Model of swimming by envelope retrograde flow: vicinity of a wall is negligible***

864 We have also solved the numerical problem for a swimmer near a solid wall. The no-slip boundary  
865 condition at the wall was imposed by taking a modified Green's function in the boundary integral  
866 formulation, as discussed in Pozrikidis C (1992)<sup>57</sup>. The same shape and retrograde flow field were  
867 taken as in the unconfined case. The orientation of the wall was chosen consistently with the  
868 experiment but the position was varied in order to scan different gaps between the cell and the wall.  
869 The resulting dependence of the swimming velocity (assuming  $\beta = 1$ ) is shown in Supplemental  
870 Figure S5.

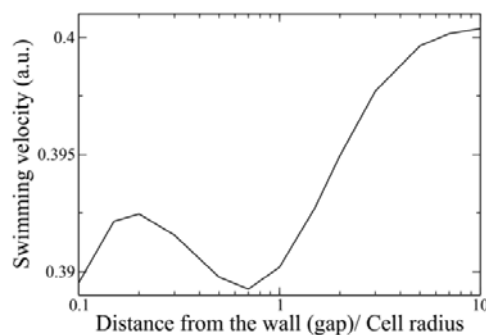

871

872 Figure S 5 : Calculated swimming velocity of cell powered by cell envelope treadmilling versus the  
873 distance of the cell to the wall normalised by the cell size. The presence of the wall influences only  
874 marginally cell speed between 0.39 and 0.4.

875

876 ***Model of swimming by envelope retrograde flow: Molecular paddling model***

877 The purpose of this section is to introduce a detailed model of the transfer of the cortex retrograde  
878 flow to the fluid surrounding the cell. The model is based on a mean-field approximation: we  
879 consider a region of a cell boundary that, on the one hand, is large compared to the size of individual  
880 proteins, and, on the other hand, is sufficiently small compared to the cell scale. These assumptions  
881 allow us to consider the cell boundary to be flat and to represent all relevant quantities as a function  
882 of the distance from the cortex, averaging them over the two remaining coordinates. The freely  
883 diffusing and the cortex-bound proteins are thus modeled as a homogeneous porous medium with  
884 an effective viscous friction with the fluid. A similar model was considered<sup>58</sup> for a flow of fluid inside  
885 a brush of polymers covering a wall and subject to an external flow. We therefore only list here the  
886 main ingredients of the solution and final results.

887 The following analysis is written in the reference frame comoving with the phospholipid bilayer. We

888 consider the actin-bound proteins to move with the cortex velocity  $v_a$ , as suggested by our  
889 measurements showing that high affinity integrins LFA-1 are advected at a speed very close to the  
890 one of actin cortex (Figure 6-I), and we call  $v_p$  the speed of proteins not bound to actin. The exact  
891 numbers of advected and non advected proteins is however not known precisely. Finally, we assume  
892 that the individual protein molecules interact only via hydrodynamic fields in the outside fluid, thus  
893 excluding short-range solid friction between them. The proteins also interact via hydrodynamic fields  
894 inside the bilayer. However, since the net velocity of the bilayer is zero in the chosen frame, this  
895 interaction would only result in a correlation of velocities in pairs of proteins located closely to each  
896 other. This would represent a higher-order effect in the concentration of cortex-bound proteins than  
897 the one considered here.

898 The protein brush can be modeled by the Brinkman equations<sup>39</sup>, which can easily be motivated as  
899 follows. The fluid in the brush is to leading order function only of the coordinate  $z$  orthogonal to the  
900 cell membrane (since the brush thickness is small as compared to the cell size), and obeys the one-  
901 dimensional nonhomogeneous Stokes equation

902 Equation 21 
$$\eta_0 \partial_{zz} v_{fx}(z) + f_x(z) = 0,$$

903 Where  $f(z)$  is the volume-related force density applied by the brush on the fluid, given by

904 Equation 22 
$$f_x(z) = \xi_i [v_a - v_{fx}(z)] + \xi_p [v_p - v_{fx}(z)],$$

905 where  $\xi_i = \varphi_i^{2D} \zeta_i / V_i$  is the volume-averaged drag coefficient of actin-bound proteins (e.g. integrins  
906 LFA-1 in the experimental part) and  $\xi_p = \varphi_p^{2D} \zeta_p / V_p$  is the volume-averaged drag coefficient of  
907 passively advected proteins (e.g. MHC-1 in the experimental part). Here  $\varphi^{2D}$  is the area fraction of  
908 corresponding proteins,  $\zeta$  is the corresponding viscous drag coefficient, and  $V$  is the volume of the  
909 extramembrane part of the corresponding protein.

910 The velocity of the free proteins,  $v_p$ , is calculated by requiring the sum of drag forces applied by  
911 them on the fluid and the bilayer to be equal to zero, which gives a condition:

912 Equation 23 
$$f_x^{bl} h^{bl} + \xi_p \int [v_p - v_{fx}(z')] dz' = 0,$$

913 where  $h$  is the thickness of the brush and  $h_{bl}$  is the thickness of the bilayer. The drag experienced by  
914 the freely advected proteins from the phospholipids of the bilayer  $f_x^{bl}$  is expressed as

915 Equation 24 
$$f_x^{bl} = \xi_{bl} v_p,$$

916 where  $\xi_{bl} = \varphi_p^{2D} \zeta_{bl} / V_{bl}$  is the volume-averaged drag coefficient inside the bilayer for passively  
917 advected proteins,  $\zeta_{bl}$  is the corresponding Stokes drag coefficient for one protein, and  $V_{bl}$  is the  
918 volume of the protein part inside the bilayer. Note that the cortex-bound proteins experience drag

919 inside the bilayer just as the passive ones do but their velocity is fully determined by the flow of the  
 920 cortex, to which they are firmly attached.

921 Equation 21 and Equation 22 can be solved for  $v_{fx}$  as a function of  $v_a$  and  $v_p$  by using the two  
 922 boundary conditions:

923 Equation 25 
$$v_{fx}(0) = 0, \quad \text{and} \quad \partial_z v_{fx}(h) = 0.$$

924 Equation 23 and Equation 24 yield the expression of  $v_p$  as a function of  $v_a$ , and thus the full  
 925 expression of the fluid velocity field as a function of drag coefficients, the membrane thickness and  
 926  $v_a$ . From this knowledge we determine  $\beta$  (which is the transmission coefficient of the cortex flow to  
 927 the fluid at the brush surface,  $z = h$ ).  $\beta$  is function of the drag coefficients and the viscosities. The  
 928 explicit forms of  $\beta$ ,  $v_p$ , and  $v_{fx}$  read

929 Equation 26 
$$\beta = \frac{\xi_a v_a + \xi_p v_p}{\xi_a + \xi_p} \left[ 1 - \frac{2g}{1+g^2} \right],$$

930 Equation 27 
$$v_p = \xi_p \xi_i v_a \frac{\lambda h(1+g^2) + 1 - g^2}{\xi_p^2(g^2 - 1) + (\xi_i \xi_p h + h_{bl} \xi_{bl}(\xi_i + \xi_p)) \lambda(1+g^2)},$$

931 Equation 28 
$$v_{fx} = \frac{\xi_i v_a + \xi_p v_p}{\xi_i + \xi_p} \left[ 1 - \frac{e^{\lambda z} + g^2 e^{-\lambda z}}{1+g^2} \right],$$

932 where  $\lambda^2 = (\xi_i + \xi_p)/\eta_0$  and  $g = e^{\lambda h}$ .

933 The Stokes drag coefficients of the proteins in the outer fluid are written as  $\zeta = 6\pi R_h \eta_0 \approx$   
 934  $10^{-10} \text{ kg/s}$ , where  $R_h$  is the Stokes radius, which we take here as 6 nm for simplicity. The Stokes  
 935 drag coefficient in bilayer can be estimated directly from the measurements of the diffusion  
 936 coefficient  $D_t^{2D}$  of MHC-1 freely advected proteins:  $\zeta_{bl} = k_B T / D_t^{2D} \approx 10^{-8} \text{ kg/s}$ . The thickness of  
 937 the bilayer is taken as 8 nm. The brush thickness is taken as 20 nm, which we estimate from the  
 938 length of integrins in activated state. The volume of the external part of the proteins is taken as  
 939  $V_i = V_p = 4\pi R_h^3 / 3 \approx 900 \text{ nm}^3$ . The volume of the bilayer segment of the passively advected  
 940 proteins is estimated as  $V_{bl} = \pi R_h^2 h_{bl} \approx 900 \text{ nm}^3$ . Supplemental Figure S 6 shows the transmission  
 941 coefficient  $\beta$  and  $\beta_p = v_p/v_a$  as a function of the concentration  $\varphi_p^{2D}$ .

942



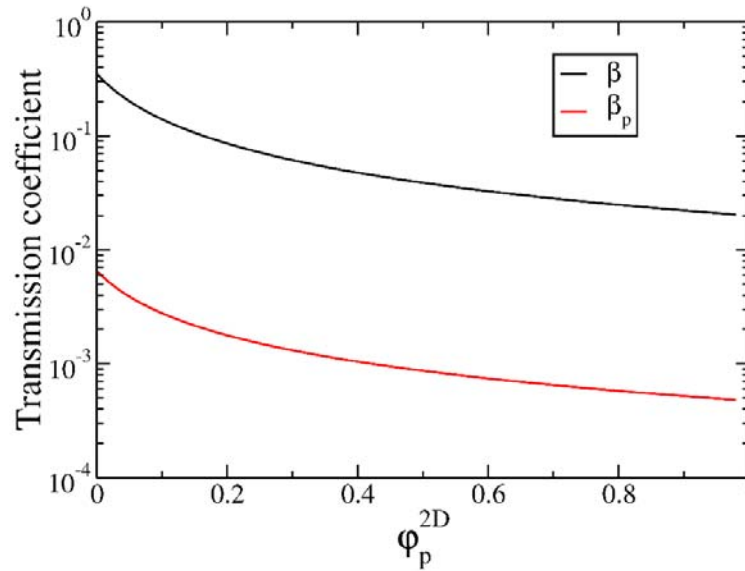

943

944 Figure S 6 : Transmission coefficients of the cortex flow to the fluid  $\beta$  (black curve) and to non  
945 advected proteins  $\beta_p$  (red curve) as a function of the concentration  $\varphi_p^{2D}$ , as given by Equation 26 and  
946 Equation 27.  $R_h = 6nm$ ,  $\eta_0 = 0.001Pa \cdot s$ ,  $h = 20nm$ ,  $\varphi_i^{2D} = 2\%$ ,  $\zeta_{bl} = 10^{-8} kg/s$ .

947

948 The analysis above was performed in the reference frame of the phospholipid bilayer. The  
949 experimental results do not allow us to establish whether a significant retrograde flow of the  
950 phospholipids is present in the reference frame of the cell envelope. Assuming the average local  
951 velocity of the phospholipids  $v_{bl}$  in the reference frame of the cell envelope is known, we can express  
952 the velocity fields in the reference frame of the swimmer envelope as  $v_f + v_{bl}$  for fluid velocity,  
953 as  $v_p + v_{bl}$  for freely diffusing proteins and as  $v_a + v_{bl}$ . The full expression for transmission  
954 coefficient is then written as  $\beta(v_{bl}) = \beta(0) + \frac{v_{bl}}{v_a}(1 - \beta(0))$ , where  $\beta(0)$  is given by Equation 26  
955 and  $v_a$  is measured in the reference frame of the cell envelope. This shows that allowing for  
956 retrograde flow of the bilayer further increases the transmission coefficient.

957

958

## 959 **Material and methods**

### 960 ***Cells***

961 Whole blood from healthy adult donors was obtained from the “Établissement Français du Sang”.  
962 Peripheral blood mononuclear cells (PBMCs) were recovered from the interface of a Ficoll gradient /  
963 “Milieu de separation des lymphocytes” (eurobio, les Ulis, France). T cells were isolated from PBMCs  
964 with Pan T cell isolation Kit (Miltenyi Biotec, Bergisch Gladbach, Germany), then were stimulated for  
965 48h with anti-CD3/anti-CD28 Dynabeads (Gibco by Thermo Fischer Scientific, Waltham, MA)  
966 according to the manufacturer’s instructions. T lymphocytes were subsequently cultivated in Roswell  
967 Park Memorial Institute Medium (RPMI) 1640 (Gibco by Thermo Fischer Scientific, Waltham, MA)  
968 supplemented with 25mM GlutaMax (Gibco by Thermo Fischer Scientific, Waltham, MA), 10% fetal  
969 bovine serum (FBS; Gibco by Thermo Fischer Scientific, Waltham, MA) at 37°C, 5% CO<sub>2</sub> in the  
970 presence of IL-2 (50ng/ml; Miltenyi Biotec, Bergisch Gladbach, Germany) and used 6 to 10days  
971 after stimulation. At the time of use, the cells were >99% positive for pan-T lymphocyte marker CD3  
972 and assessed for activation and proliferation with CD25, CD45RO, CD45RA and CD69 markers as  
973 judged by flow cytometry.

### 974 ***Quantitative cytometry for integrin expression level***

975 For the quantification, we used the CellQuant calibrator kit (ref 7208, Biocytex). T cells were stained  
976 by indirect immunofluorescence with specific monoclonal antibodies, CD49d (HP2/1) for VLA-4 and  
977 CD11a (Hi111) for LFA-1, then analyzed by quantitative flow cytometry. The expression level of the  
978 tested antigen was determined using the kit calibration beads.  
979

### 980 ***Transduction of cells***

981 For soSPIM experiments with LifeAct transduced cells, virus was produced in HEK 293T cells by co-  
982 transfecting the lentiviral plasmids pLenti.PGK.LifeAct-Ruby.W (a gift from Rusty Lansford - Addgene  
983 plasmid #51009) with psPAX2 and pMD2.G (a gift from Didier Trono - Addgene plasmid #12260 and  
984 #12259). PBMC were transduced by spinoculation of virus using polybrene, after 48h activation with  
985 CD3-CD28 Dynabeads. The cells were then cultured with IL-2, and used 8 days after activation. The  
986 expression of LifeAct-RFP was controlled by flow cytometry. For TIRF-FRAP experiments cells, RFP-  
987 Lentivirus for RFP-actin transduction were bought from Merck (Lentibrite™ RFP-β-actin lentiviral  
988 biosensor) and cells were transduced 48h after activation with an MOI of 10. For GFP-actin  
989 transfection, plasmid EGFP-Actin-7 from Addgene (ref 56421) was used with the electroporation  
990 program Amaxa T20.

991 ***Microfluidic channels and surface treatments***

992 PDMS microchannels were fabricated using standard soft lithography. A positive mould was created  
993 with a negative photoresist SU-8 3000 (Microchem) on silicon wafers (Siltronix), then replicas were  
994 moulded in polydimethylsiloxane (PDMS) elastomer (Sylgard 184, Dow Corning) and sealed on glass  
995 cover slides via plasma activation (Harricks Plasma). The device is composed of one channel with one  
996 inlet and one outlet punched with a 2.4 mm puncher (Harris Uni-Core). For adherent crawling  
997 experiments, Ibidi channels IV<sup>0.4</sup> (Clinisciences) were coated overnight at 4°C with 10µg/ml human  
998 ICAM-1-Fc (R&D Systems) in Phosphate Buffer Solution (PBS) (Gibco). Channels were subsequently  
999 blocked with a solution containing 2.5% bovine serum album (BSA) (w/v; Axday, France) and 2.5%  
1000 Pluronic acid F-108 (w/v; BASF, Germany) in PBS for 30 min at room temperature, then rinsed three  
1001 times with PBS and finally with HBSS. Cells were injected at densities around  $1.5 \times 10^6$ /ml and allowed  
1002 to equilibrate for 10 min at 37°C before image acquisition. For non-adherent migration or swimming  
1003 experiments, Ibidi channels IV<sup>0.4</sup> and PDMS microchannels were incubated with Pluronic F-127  
1004 (Sigma-Aldrich) for 30 min at room temperature, then rinsed three times with PBS and finally with  
1005 HBSS. Cells were injected at a densities around  $0.75 \times 10^6$ /ml in Ibidi channels and  $6 \times 10^6$ /ml in PDMS  
1006 microchannels of height 40 µm. Cells were allowed to equilibrate for 10 min at 37°C before image  
1007 acquisition.

1008

1009 ***Cell treatments***

1010 Stock solutions of blebbistatin (Fischer Bioblock Scientific), CK666 (Sigma-Aldrich) and Latrunculin  
1011 (L12370, 2.37 mM; Molecular Probes) were prepared in DMSO following manufacturer's  
1012 specification, stored at -20°C and then diluted in culture medium for used in experiments. Cells were  
1013 resuspended in solutions of 50 µM blebbistatin, 100 µM CK666 and 50 nM Latrunculin, injected in  
1014 the microchannels, and allowed to settle in the channels for a period of 30 min at 37 °C before image  
1015 acquisition.

1016

1017 ***Viscosity and osmolarity measurements***

1018 Viscosity changes were performed using Dextran of average molecular weight of 1500-2800 KDa  
1019 (Sigma-Aldrich) at concentrations of 50 and 150 g/L. HBSS alone has a viscosity value of 0.001 Pa.s  
1020 while the viscosity for HBSS+50g/L Dextran is 0.01 and for HBSS+150g/L Dextran it is 0.1 Pa.s. Adding  
1021 Dextran to the media increased the viscosity as well as the osmolarity up to 355 mosm/kg for the  
1022 solution HBSS+150g/L Dextran. Dextrose (Sigma-Aldrich) was then used as an osmolarity control in  
1023 HBSS media supplemented with 25mM HEPES. Osmolarity measurements for the different media  
1024 were performed using the automatic Micro-Osmometer Type 15 (Loser Messtechnik), calibration was

1025 done using standard solutions of 300 and 900 mosm/kg H<sub>2</sub>O according to the manufacturer's  
1026 instructions.

1027

1028

### 1029 ***Experimental fluidic setup***

1030 All experiments were performed in a home-made chamber precisely thermostated at 37°C to limit  
1031 temperature instability potentially inducing flow drifts within fluidic devices. For swimming close to a  
1032 surface, we used Ibidi channels for experiments in HBSS, Dextrose and 50g/L Dextran solutions, and  
1033 40 µm high PDMS microchannels for experiments in in 150g/L Dextran 40 µm high to limit the  
1034 observation range in the z axis because cells did not sediment. To minimize flow, channels were  
1035 sealed with the plastic cap for Ibidi channels, or with a 250 µM thickness PDMS film for the PDMS  
1036 microchannels and the devices on the microscope stage were surrounded by a 100% humidity  
1037 chamber to minimize evaporation through PDMS. For experiments of swimming in suspension, cells  
1038 were resuspended in 66% Ficoll to limit sedimentation effects, and injected in 100 µm high channels.  
1039 Minimization of drifts for swimming in suspension was more challenging than for the swimming close  
1040 to a substrate. The microfluidic channel was set vertical (along the gravity axis) and the whole  
1041 microscope was tilted by 90° to get side-observation view. The channel was connected to a  
1042 microfluidic flow control system (Fluigent MFCS-EZ) to control the unidirectional flow towards the  
1043 bottom, and we used 2 meter long tubes of 0.5 µm internal diameter to further limit drift by  
1044 hydraulic resistance. Cell motion were recorder for at least 100 frames every 10 seconds.

1045

### 1046 ***Cell motion imaging***

1047 Experiments were performed with an inverted Zeiss Z1 automated microscope (Carl Zeiss, Germany)  
1048 equipped with a CoolSnap HQ CCD camera (Photometrics) and piloted by µManager<sup>1,4</sup>. Different  
1049 objectives were used for bright-field mode (Plan-Apochromat 20x/0.8, 63x/1.4 objectives) and for  
1050 reflection interference contrast microscopy (RICM) mode (Neofluar 63/1.25 antilex). A narrow band-pass  
1051 filter ( $\lambda=546 \text{ nm} \pm 12 \text{ nm}$ ) was used for RICM. Three dimensional imaging was performed on cells  
1052 stained with a lipophilic tracer DiO (Invitrogen) and cells transfected with lifeAct-RFP cells. The  
1053 imaging was done using a Spinning disk (Inverted Nikon Eclipse TI) equipped with two cameras  
1054 (Photometrics EMCCD evolve) and controlled by Metamorp, and a home made single-objective  
1055 selective plane illumination microscopy (soSPIM) set-up (see special section for details).

1056

### 1057 ***soSPIM imaging and analysis***

1058 The soSPIM system, for single-objective Selective Plane Illumination Microscope, is a recently  
1059 developed architecture which enables to combine the advantages of low photo-toxicity and high  
1060 optical sectioning of light-sheet microscopy techniques with the high sensitivity provided by high  
1061 numerical aperture objectives<sup>59</sup>. The set-up is composed of a high numerical aperture objective (CFI  
1062 Plan Apochromat VC 60x WI 1.27NA), a beam steering unit and dedicated micro-fabricated devices  
1063 containing mirrors angled at 45° alongside micro-wells. The soSPIM components are mounted on a  
1064 conventional inverted microscope (Nikon Ti-E). The micro-fabricated chambers (see <sup>59</sup> for detailed  
1065 descriptions of the chambers) are placed on an axial translation piezo stage (Mad City Lab) within a  
1066 controlled environment chambers (Tokai Hit) for live cell imaging. Fluorescence emission is collected  
1067 through the same objective used for excitation and is captured on a sCMOS camera (ORCA-Flash 4.0  
1068 V2, Hamamatsu). The whole acquisition process is steered under MetaMorph environment  
1069 (Molecular Device) using a home-made designed plugin which synchronize the excitation and  
1070 acquisition processes. Further details of soSPIM setup, calibration, and synchronization are described  
1071 in<sup>59</sup>. The 3-dimensional time series data sets acquired with the soSPIM set-up were analysed using  
1072 the freely available software UCSF Chimera<sup>60</sup> (developed by the Resource for Biocomputing,  
1073 Visualization, and Informatics at the University of California, San Francisco (supported by NIGMS P41-  
1074 GM103311)). This software enables to render surfaces of equal fluorescence intensity as well as  
1075 normalization and alignment of whole 3D time series which enhances the possibility to visualize cell  
1076 membrane movement in our case.

### 1077 ***Molecular motility imaging***

1078 For TIRF-FRAP experiments, cells were resuspended in HBSS-Dextran 150g/L solution at a  
1079 concentration of  $4.5 \times 10^6$  cells/ml, in the presence of CD11a/CD18 (Biolegend, clone M24) and HLA-  
1080 A,B,C (Biolegend, clone W6/32) primarily conjugated antibodies. Alternatively cells were labeled with  
1081 Vybrant® DiO by 10 min incubation at 37°C in the presence of 5 ul of dye per  $1.5 \times 10^6$  cells, then  
1082 washed twice with HBSS and resuspended in HBSS-Dextran. For LifeAct-RFP cells, no further staining  
1083 was required. Cell suspensions were loaded into the devices and centrifuged for 3 min at 200 RCF.  
1084 Cells were allowed to equilibrate for at least 10 min at 37°C before image acquisition. Movies were  
1085 recorded on a Nikon Eclipse Ti microscope, equipped with iLas2 system and controlled by  
1086 Metamorph software. For DiO and MHC-1 staining, diffusion coefficients were calculated using the  
1087 SimFRAP ImageJ plugin\*. LFA-1 cluster speed values were calculated from kymographs performed  
1088 along the cell axis, while Actin flow was calculated measuring the displacement of the frapped  
1089 region. All values were corrected by the advance of the front edge, measured by a kymograph along  
1090 the cell axis, to obtain a value relative to the cell front.

## 1091 **Cell tracking**

1092 For swimming experiment in the vicinity of a substrate (in 2D), cells were tracked with a home-made  
1093 program (MATLAB software, The MathWorks, Natick, MA, USA) and raw curvilinear velocities of  
1094 swimming cells were calculated using trajectory time points every 30s. Residual flow drift was  
1095 corrected on each cell trajectory using the mean x- and y-movements values of all cells between 2  
1096 pictures. For high viscosity experiments, the fraction of cells squeezed toward the substrate by  
1097 depletion force were discarded from the analysis. For swimming experiment in suspension (in 3D), a  
1098 stack of bright-field images was taken every 10 s across the 100  $\mu\text{m}$  height of the channel with a  
1099 spatial pitch of 5  $\mu\text{m}$ . To determine the position a particular cell on the x-axis at a given time, we  
1100 analyzed the intensity distribution of the image of this cell on all images of the x-axis stacks. The best  
1101 focus corresponded to the image with the minimum standard deviation of the intensity, which  
1102 yielded a x-position with a precision of 2.5  $\mu\text{m}$ . Each cell trajectory was fragmented in 30s steps and  
1103 cell-step speed was calculated using coordinates along x- and z-axis. The speed component along y  
1104 was considered negligible because we selected cells with an orientation perpendicular to Y-axis. Total  
1105 cell speed was calculated as the mean of all the 30s steps-speed for each cell.

## 1106 **Beads advection experiments**

1107 Streptavidin-coupled beads with a diameter of 2.7  $\mu\text{m}$  (Dynabeads<sup>®</sup> M-270 Streptavidin, Invitrogen)  
1108 were washed three times with 0.1% BSA (w/v), then incubated with 0.5 $\mu\text{g}/\text{ml}$  biotin-coupled Protein-  
1109 A (Sigma-Aldrich) for 1 hour under stirring at room temperature and rinsed with 0.1% BSA. The beads  
1110 were then incubated with 500 $\mu\text{g}/\text{ml}$  ICAM for 2 hours at room temperature and rinsed with 0.1%  
1111 BSA. A final concentration of 0.125mg/ml Dynabeads was added to the cell suspension. Bright-field  
1112 images (Plan-Apochromat  $\times 20/0.8$ ) were taken every 3s. Beads were tracked manually from the  
1113 moment the bead attached to the cell front until it reached the cell rear. Cell are moving in the frame  
1114 of the laboratory and cell rear was taken as a reference of bead position. All experiments were  
1115 performed at least in triplicate for each substrate and/or drug.

1116

## 1117 **Contributions**

1118 LA and PN worked on all experiments and analysis. AF and CM developed all modeling and  
1119 simulations, MSR performed modeling of swimming by shape deformation, NGS performed  
1120 experiments of beads tracking and all FRAP-TIRF assays; XL performed migration assays on patterned  
1121 substrates, SD and CH prepared cells transfected with GFP actin, MB cultured cells performed  
1122 transfection with RFP-Lifeact and quantitative cytometry, MPV participated to experiments and  
1123 analysis, RG and JBS performed 3D live imaging by soSPIM, CH and SD prepared GFP-actin cells, SR

1124 performed viscosity measurements and participated to discussions and, OT participated to all  
1125 experiments and analysis, CM and OT designed the study and wrote the paper.

1126

## 1127 **Acknowledgments**

1128 The work at LAI was supported by the ANR grant RECRUTE, LABEX INFORM, the Région PACA,  
1129 Institute CENTURI, Nanolane company and Alveole company. We thank the France Bioimaging  
1130 Platform, funded by the French Agence Nationale de la Recherche (ANR--10--INBS--04--01,  
1131 «Investments for the future»). We are grateful to Alphée Michelot for his support and advices with  
1132 TIRF-FRAP imaging, to Laurence Borge for assistance with the use of the Cell Culture Platform facility  
1133 (Luminy TPR2-INSERM), to Claire Chardes and Pierre-Francois Lenne for help with light sheet imaging,  
1134 Michael Sixt for advices on Actin flow measurements, and Yannick Hammon for helpful discussions.  
1135 Authors also thank the Electronic imaging centre of Bordeaux Imaging Centre for metallization of the  
1136 soSPIM chambers, the National Research Agency (ANR) grant soSPIM, and the National infrastructure  
1137 France-BioImaging supported by the French National Research Agency (ANR-10-INBS-04). The work  
1138 at LIPHY was supported by CNES (Centre National d'Etudes Spatiales), ESA (European Space Agency)  
1139 and the French-German university programme "Living Fluids" (grant CFDA-Q1-14). C.M. and S.R.  
1140 thank D.K. Dysthe for many valuable discussions and for having clarified several issues of the  
1141 amoeboid swimming problem during his one year stay in Liphy in 2011, as well as Alain Duperray and  
1142 Nawal Quennouz for valuable discussions regarding their preliminary experiments on swimming of  
1143 neutrophils.

## 1144 **Bibliography**

- 1145 1. Taylor, G. Analysis of the Swimming of Microscopic Organisms. *Proc. R. Soc. Lond. Math. Phys.*  
1146 *Eng. Sci.* **209**, 447–461 (1951).
- 1147 2. Farutin, A. *et al.* Amoeboid Swimming: A Generic Self-Propulsion of Cells in Fluids by Means of  
1148 Membrane Deformations. *Phys. Rev. Lett.* **111**, 228102 (2013).
- 1149 3. Abercrombie, M. The Croonian Lecture, 1978: The Crawling Movement of Metazoan Cells. *Proc.*  
1150 *R. Soc. Lond. B Biol. Sci.* **207**, 129–147 (1980).
- 1151 4. Ridley, A. J. *et al.* Cell migration: Integrating signals from front to back. *Science* **302**, 1704–1709  
1152 (2003).

- 1153 5. Lämmermann, T. *et al.* Rapid leukocyte migration by integrin-independent flowing and  
1154 squeezing. *Nature* **453**, 51–55 (2008).
- 1155 6. Malawista, S. E. & Chevance, A. de B. Random locomotion and chemotaxis of human blood  
1156 polymorphonuclear leukocytes (PMN) in the presence of EDTA: PMN in close quarters require  
1157 neither leukocyte integrins nor external divalent cations. *Proc. Natl. Acad. Sci.* **94**, 11577–11582  
1158 (1997).
- 1159 7. Malawista, S. E., de Boisfleury Chevance, A. & Boxer, L. A. Random locomotion and chemotaxis of  
1160 human blood polymorphonuclear leukocytes from a patient with Leukocyte Adhesion  
1161 Deficiency-1: Normal displacement in close quarters via chimneying. *Cytoskeleton* **46**, 183–189  
1162 (2000).
- 1163 8. Paluch, E. K., Aspalter, I. M. & Sixt, M. Focal Adhesion–Independent Cell Migration. *Annu. Rev.*  
1164 *Cell Dev. Biol.* **32**, 469–490 (2016).
- 1165 9. Renkawitz, J. *et al.* Adaptive force transmission in amoeboid cell migration. *Nat. Cell Biol.* **11**,  
1166 1438–1443 (2009).
- 1167 10. Hawkins, R. *et al.* Pushing off the Walls: A Mechanism of Cell Motility in Confinement. *Phys. Rev.*  
1168 *Lett.* **102**, (2009).
- 1169 11. Bergert, M. *et al.* Force transmission during adhesion-independent migration. *Nat. Cell Biol.* **17**,  
1170 524–529 (2015).
- 1171 12. Barry, N. P. & Bretscher, M. S. Dictyostelium amoebae and neutrophils can swim. *Proc. Natl.*  
1172 *Acad. Sci.* **107**, 11376–11380 (2010).
- 1173 13. Haastert, P. J. M. V. Amoeboid Cells Use Protrusions for Walking, Gliding and Swimming. *PLOS*  
1174 *ONE* **6**, e27532 (2011).
- 1175 14. Bae, A. J. & Bodenschatz, E. On the swimming of Dictyostelium amoebae. *Proc. Natl. Acad. Sci.*  
1176 **107**, E165–E166 (2010).
- 1177 15. Howe, J. D., Barry, N. P. & Bretscher, M. S. How Do Amoebae Swim and Crawl? *PLOS ONE* **8**,  
1178 e74382 (2013).



- 1179 16. Lim, F. Y., Koon, Y. L. & Chiam, K.-H. A computational model of amoeboid cell migration. *Comput.*  
1180 *Methods Biomech. Biomed. Engin.* (2013).
- 1181 17. Stone, H. A. & Samuel, A. D. Propulsion of microorganisms by surface distortions. *Phys. Rev. Lett.*  
1182 **77**, 4102 (1996).
- 1183 18. O'Neill, P. R. *et al.* Membrane Flow Drives an Adhesion-Independent Amoeboid Cell Migration  
1184 Mode. *Dev. Cell* **46**, 9-22.e4 (2018).
- 1185 19. Vargas, P. *et al.* Innate control of actin nucleation determines two distinct migration behaviours  
1186 in dendritic cells. *Nat. Cell Biol.* **18**, 43–53 (2015).
- 1187 20. Bergert, M., Chandradoss, S. D., Desai, R. A. & Paluch, E. Cell mechanics control rapid transitions  
1188 between blebs and lamellipodia during migration. *Proc. Natl. Acad. Sci.* **109**, 14434–14439  
1189 (2012).
- 1190 21. Ruprecht, V. *et al.* Cortical Contractility Triggers a Stochastic Switch to Fast Amoeboid Cell  
1191 Motility. *Cell* **160**, 673–685 (2015).
- 1192 22. Renkawitz, J. & Sixt, M. Mechanisms of force generation and force transmission during  
1193 interstitial leukocyte migration. *EMBO Rep.* **11**, 744–750 (2010).
- 1194 23. Friedl, P. & Wolf, K. Plasticity of cell migration: a multiscale tuning model. *J. Cell Biol.*  
1195 jcb.200909003 (2009). doi:10.1083/jcb.200909003
- 1196 24. Valignat, M.-P., Theodoly, O., Gucciardi, A., Hogg, N. & Lellouch, A. C. T Lymphocytes Orient  
1197 against the Direction of Fluid Flow during LFA-1-Mediated Migration. *Biophys. J.* **104**, 322–331  
1198 (2013).
- 1199 25. Smith, A. *et al.* A talin-dependent LFA-1 focal zone is formed by rapidly migrating T lymphocytes.  
1200 *J. Cell Biol.* **170**, 141–151 (2005).
- 1201 26. Henry, S. J., Crocker, J. C. & Hammer, D. A. Ligand density elicits a phenotypic switch in human  
1202 neutrophils. *Integr. Biol.* **6**, 348 (2014).

- 1203 27. Gorina, R., Lyck, R., Vestweber, D. & Engelhardt, B. beta(2) Integrin-Mediated Crawling on  
1204 Endothelial ICAM-1 and ICAM-2 Is a Prerequisite for Transcellular Neutrophil Diapedesis across  
1205 the Inflamed Blood-Brain Barrier. *J. Immunol.* **192**, 324–337 (2014).
- 1206 28. Krummel, M. F., Friedman, R. S. & Jacobelli, J. Modes and mechanisms of T cell motility: roles for  
1207 confinement and Myosin-IIA. *Curr. Opin. Cell Biol.* **30**, 9–16 (2014).
- 1208 29. Wilson, K. *et al.* Mechanisms of leading edge protrusion in interstitial migration. *Nat. Commun.* **4**,  
1209 (2013).
- 1210 30. Theodoly, O., Huang, Z.-H. & Valignat, M.-P. New modeling of reflection interference contrast  
1211 microscopy including polarization and numerical aperture effects: application to nanometric  
1212 distance measurements and object profile reconstruction. *Langmuir ACS J. Surf. Colloids* **26**,  
1213 1940–1948 (2010).
- 1214 31. Doyle, A. D., Wang, F. W., Matsumoto, K. & Yamada, K. M. One-dimensional topography  
1215 underlies three-dimensional fibrillar cell migration. *J. Cell Biol.* **184**, 481–490 (2009).
- 1216 32. Fritz-Laylin, L. K. *et al.* Actin-based protrusions of migrating neutrophils are intrinsically lamellar  
1217 and facilitate direction changes. *Elife* **6**, e26990 (2017).
- 1218 33. Maiuri, P. *et al.* Actin Flows Mediate a Universal Coupling between Cell Speed and Cell  
1219 Persistence. *Cell* **161**, 374–386 (2015).
- 1220 34. Batchelder, E. L. *et al.* Membrane tension regulates motility by controlling lamellipodium  
1221 organization., Membrane tension regulates motility by controlling lamellipodium organization.  
1222 *Proc. Natl. Acad. Sci. U. S. Am. Proc. Natl. Acad. Sci. U. S. Am.* **108**, **108**, 11429, 11429–11434  
1223 (2011).
- 1224 35. Samuelsson, M. *et al.* RhoB controls the Rab11-mediated recycling and surface reappearance of  
1225 LFA-1 in migrating T lymphocytes. *Sci. Signal.* **10**, eaai8629 (2017).
- 1226 36. Paul, N. R., Jacquemet, G. & Caswell, P. T. Endocytic Trafficking of Integrins in Cell Migration.  
1227 *Curr. Biol.* **25**, R1092–R1105 (2015).

- 1228 37. Arjonen, A., Alanko, J., Veltel, S. & Ivaska, J. Distinct Recycling of Active and Inactive ss 1  
1229 Integrins. *Traffic* **13**, 610–625 (2012).
- 1230 38. Franceschi, N. D., Hamidi, H., Alanko, J., Sahgal, P. & Ivaska, J. Integrin traffic – the update. *J Cell*  
1231 *Sci* **128**, 839–852 (2015).
- 1232 39. Brinkman, H. C. A calculation of the viscous force exerted by a flowing fluid on a dense swarm of  
1233 particles. *Flow Turbul. Combust.* **1**, 27 (1949).
- 1234 40. Jacobelli, J., Bennett, F. C., Pandurangi, P., Tooley, A. J. & Krummel, M. F. Myosin-IIA and ICAM-1  
1235 Regulate the Interchange between Two Distinct Modes of T Cell Migration. *J. Immunol.* **182**,  
1236 2041–2050 (2009).
- 1237 41. Barry, N. P. & Bretscher, M. S. Dictyostelium amoebae and neutrophils can swim. *Proc. Natl.*  
1238 *Acad. Sci.* **107**, 11376–11380 (2010).
- 1239 42. Poincloux, R. *et al.* Contractility of the cell rear drives invasion of breast tumor cells in. *Proc. Natl.*  
1240 *Acad. Sci. U. S. A.* **108**, 1943–1948 (2011).
- 1241 43. Blaser, H. *et al.* Migration of Zebrafish Primordial Germ Cells: A Role for Myosin Contraction and  
1242 Cytoplasmic Flow. *Dev. Cell* **11**, 613–627 (2006).
- 1243 44. Shih, W. & Yamada, S. Myosin IIA Dependent Retrograde Flow Drives 3D Cell Migration. *Biophys.*  
1244 *J.* **98**, L29–L31 (2010).
- 1245 45. Faure-André, G. *et al.* Regulation of Dendritic Cell Migration by CD74, the MHC Class II-  
1246 Associated Invariant Chain. *Science* **322**, 1705–1710 (2008).
- 1247 46. Jay, P. Y., Pham, P. A., Wong, S. A. & Elson, E. L. A mechanical function of myosin II in cell  
1248 motility. *J. Cell Sci.* **108**, 387–393 (1995).
- 1249 47. Leshansky, A. M., Kenneth, O., Gat, O. & Avron, J. E. A frictionless microswimmer. *New J. Phys.* **9**,  
1250 145–145 (2007).
- 1251 48. Liu, Y.-J. *et al.* Confinement and Low Adhesion Induce Fast Amoeboid Migration of Slow  
1252 Mesenchymal Cells. *Cell* **160**, 659–672 (2015).

- 1253 49. Paluch, E. K. & Raz, E. The role and regulation of blebs in cell migration. *Curr. Opin. Cell Biol.* **25**,  
1254 582–590 (2013).
- 1255 50. Charras, G. & Paluch, E. Blebs lead the way: how to migrate without lamellipodia. *Nat. Rev. Mol.*  
1256 *Cell Biol.* **9**, 730–736 (2008).
- 1257 51. Paluch, E., Sykes, C., Prost, J. & Bornens, M. Dynamic modes of the cortical actomyosin gel during  
1258 cell locomotion and division. *Trends Cell Biol.* **16**, 5–10 (2006).
- 1259 52. Laemmermann, T. & Sixt, M. Mechanical modes of ‘amoeboid’ cell migration. *Curr. Opin. Cell*  
1260 *Biol.* **21**, 636–644 (2009).
- 1261 53. Stroka, K. M. *et al.* Water Permeation Drives Tumor Cell Migration in Confined  
1262 Microenvironments. *Cell* **157**, 611–623 (2014).
- 1263 54. Strale, P.-O. *et al.* Multiprotein Printing by Light-Induced Molecular Adsorption. *Adv. Mater.* **28**,  
1264 2024–2029 (2016).
- 1265 55. Saintillan, D. & Shelley, M. J. Active suspensions and their nonlinear models. *Comptes Rendus*  
1266 *Phys.* **14**, 497–517 (2013).
- 1267 56. Farutin, A., Biben, T. & Misbah, C. 3D numerical simulations of vesicle and inextensible capsule  
1268 dynamics. *J. Comput. Phys.* **275**, 539–568 (2014).
- 1269 57. Pozrikidis, C. Boundary Integral and Singularity Methods for Linearized Viscous Flow -  
1270 doi:10.1017/CBO9780511624124. in (Cambridge University Press., 1992).
- 1271 58. Kim, Y. W. *et al.* Nonlinear Response of Grafted Semiflexible Polymers in Shear Flow.  
1272 *Macromolecules* **42**, 3650–3655 (2009).
- 1273 59. Galland, R. *et al.* 3D high- and super-resolution imaging using single-objective SPIM. *Nat.*  
1274 *Methods* **12**, 641–644 (2015).
- 1275 60. Pettersen, E. F. *et al.* UCSF Chimera—a visualization system for exploratory research and analysis.  
1276 *J. Comput. Chem.* **25**, 1605–1612 (2004).
- 1277
